1           **Mechanics and energetics of walking and running up and downhill: A joint-level**  
2                           **perspective to guide design of lower-limb exoskeletons**

3  
4   Richard W. Nuckols<sup>1\*</sup>, Kota Z. Takahashi<sup>2</sup>, Dominic J. Farris<sup>3</sup>, Sarai Mizrachi<sup>4</sup>, Raziel Riemer<sup>4</sup>,  
5   Gregory S. Sawicki<sup>5</sup>

6  
7   <sup>1</sup>School of Engineering and Applied Sciences,  
8   Harvard University and Wyss Institute  
9   Cambridge, Massachusetts, United States of America

10  
11   <sup>2</sup>Department of Biomechanics  
12   University of Nebraska at Omaha  
13   Biomechanics Research Building  
14   Omaha, Nebraska, United States of America

15  
16   <sup>3</sup> Department of Sport and Health Sciences,  
17   University of Exeter,  
18   St Luke's Campus,  
19   Exeter, United Kingdom

20  
21   <sup>4</sup> Department of Industrial Engineering and Management  
22   Ben-Gurion University of the Negev, Beer-Sheva, Israel

23  
24   <sup>5</sup> School of Mechanical Engineering and Biological Sciences  
25   Georgia Institute of Technology  
26   Atlanta, Georgia, United States of America

27  
28   \*Author to whom correspondence should be addressed.  
29   Email: [rnuckols@g.harvard.edu](mailto:rnuckols@g.harvard.edu)

## 32 **Abstract**

33 Lower-limb wearable robotic devices can provide effective assistance to both clinical and  
34 healthy populations; however, how assistance should be applied in different gait conditions and  
35 environments is still unclear. We suggest a biologically-inspired approach derived from  
36 knowledge of human locomotion mechanics and energetics to establish a ‘roadmap’ for wearable  
37 robot design. In this study, we characterize the changes in joint mechanics during both walking  
38 and running across a range of incline/decline grades and then provide an analysis that informs  
39 the development of lower-limb exoskeletons capable of operating across a range of mechanical  
40 demands. Eight subjects (6M,2F) completed five walking ( $1.25 \text{ m}^{-1}$ ) trials at -15%, -10%, 0%,  
41 10%, and 15% grade and five running ( $2.25 \text{ m s}^{-1}$ ) trials at -10%, -5%, 0%, 5%, and 10% grade  
42 on a treadmill. We calculated time-varying joint moment and power output for the ankle, knee,  
43 and hip. For each gait, we examined how individual limb-joints contributed to total limb  
44 positive, negative and net power across grades. For both walking and running, changes in grade  
45 caused a redistribution of joint mechanical power generation and absorption. From level to  
46 incline walking, the ankle’s contribution to limb positive power decreased from 44% on the level  
47 to 28% at 15% uphill grade ( $p < 0.0001$ ) while the hip’s contribution increased from 27% to 52%  
48 ( $p < 0.0001$ ). In running, regardless of the surface gradient, the ankle was consistently the  
49 dominant source of lower-limb positive mechanical power (47-55%). In the context of our  
50 results, we outline three distinct use-modes that could be emphasized in future lower-limb  
51 exoskeleton designs 1) Energy injection: adding positive work into the gait cycle, 2) Energy  
52 extraction: removing negative work from the gait cycle, and 3) Energy transfer: extracting  
53 energy in one gait phase and then injecting it in another phase (*i.e.*, regenerative braking).

## 54 **Introduction**

55 Lower-limb robotic exoskeletons can apply assistive torque to reduce the metabolic  
56 energy used by biological muscles to produce the force and work for locomotion [1]. A majority  
57 of these successful exoskeletons have focused on providing assistance at the ankle within a  
58 laboratory setting [2-10]. More recently, devices have begun to move outside of laboratory  
59 confinement. Fully-autonomous, portable devices have been demonstrated to reduce the  
60 metabolic cost of walking with [11] and without [3] additional load and during running [12]. A  
61 key factor for all of these systems is the coordination between the wearable robot and the human  
62 user.

63 Researchers have dedicated significant time and effort to understanding the interaction  
64 between exoskeleton control strategies and the physiological response of the human user. The  
65 high-level method for generating control commands [13, 14], the shape, the timing and  
66 magnitude of the torque assistance profile [15-17], and the lower-limb joint where assistance is  
67 targeted [17-20] can all influence how well the user responds. Notably, to date most  
68 exoskeleton research studies have focused on optimizing controllers for a single gait at a fixed  
69 speed on level ground. However, although great advances have been made by this approach, to  
70 fully parameterize control strategies for the real-world, a more diverse range of locomotor  
71 scenarios must be explored. While brute force parameter sweeps and human-in-the loop  
72 optimization have been used to determine torque profiles on an individual basis [6, 7, 10, 21],  
73 discovering an optimal policy can take many hours and may not generalize beyond current test  
74 conditions. Thus, there is a need for simpler approaches to exoskeleton control that do not rely  
75 on (re)tuning, but rather use insights into the mechanism of these tasks in order to be effective  
76 across variable locomotion conditions (*e.g.*, speed, grade, gait).

77           As exoskeletons become increasingly mobile, a clear problem arises: How can engineers  
78 deliver systems that can assist in natural environments where locomotion involves adjusting  
79 speed, changing gait from walk to run, and moving uphill or downhill? Indeed, few exoskeleton  
80 studies have focused on incline/decline walking [4, 22] or compared assistance strategies across  
81 speeds [10] in which mechanistic explanations for performance outcomes were provided.  
82 Injection of positive power has been shown to be a promising approach for achieving metabolic  
83 cost reduction [23]; however, whether this approach is effective across all leg joints or if it is  
84 effective across different grades or gaits is unknown. We suggest that a bio-inspired mechanistic  
85 understanding of how people move and exchange energy between their lower-limb joints and the  
86 external environment is crucial for successful designs that make exoskeletons truly effective in  
87 real-world conditions.

88           In fact, this mechanistic approach has been previously applied to exoskeleton  
89 development and logically explains why the field has so heavily focused on the ankle as a target  
90 for assistance in level walking [2, 5, 9]. The ankle provides the majority of power on level  
91 ground [24] and disrupted ankle mechanics common in clinical populations make it a good target  
92 for assistance [25, 26]. Guidance from baseline human gait data has motivated a bioinspired  
93 approach to borrow ‘best’ concepts from the biological system to guide design of wearable  
94 devices. For example, our previous work to design and test a clutch-spring ankle ‘exo-tendon’ [5,  
95 9, 10] was directly inspired by insights from imaging research examining ankle muscle-tendon  
96 interaction dynamics [27, 28].

97           The same mechanistic approach can be applied towards the development of exoskeletons  
98 in non-level gait. In moving to inclines and declines, fundamental physics shape mechanical  
99 demands on the legs. Muscles must add or remove net mechanical energy lost or gained

100 according to changes in height of the center of mass (COM) [29, 30] and numerous studies have  
101 contributed to our understanding of the dynamics of uphill and downhill gait at various speeds  
102 [31-41]. Joint level mechanical analyses through inverse dynamics have provided more detailed  
103 insight into the sources of mechanical energy generation/dissipation moving uphill/downhill,  
104 respectively. In general, hip moments increase during incline walking to add net mechanical  
105 work; and knee moments increase during decline walking to subtract net mechanical work [32,  
106 37, 38]. In incline running, the required increase in energy also results from a shift in net power  
107 output to the hip [31, 38]. Inverse dynamics analysis has also been used to evaluate the effect of  
108 aging on the joint kinematics and kinetics of uphill walking and reveals that older adults perform  
109 more hip work and less ankle work in both level ground and incline walking [34]. Other studies  
110 have demonstrated that individual joint dynamics can be used as a predictive tool for estimating  
111 the metabolic cost of walking, with 89% of the added metabolic cost of incline walking  
112 explained through changes in joint kinematics and kinetics [33].

113         The purpose of this study was to characterize changes in lower-limb joint mechanics  
114 during both walking and running across a range of incline/decline grades and then provide an  
115 analysis that informs lower-limb exoskeleton development (Fig. 1). More specifically, we sought  
116 to add an applied twist to current basic science understanding by focusing interpretation of the  
117 measured changes in human joint mechanics to guide the development of versatile exoskeleton  
118 systems with the ability to inject (net positive work), remove (net negative work) and transfer  
119 (net zero work) mechanical energy to meet variable mechanical demands of real-world  
120 environments.

121 **Figure 1: Schematic of experimental design and analysis.** Representation of gait conditions  
122 for characterizing changes in lower-limb mechanics during walking and running across incline

123 and decline grades. Example of energy cycle and potential mechanisms for how physiological  
124 mechanisms may provide a roadmap for informing lower-limb exoskeleton development.

## 125 **Methods**

126 Eight adults (6M,2F, age:  $23.38 \pm 4.10$  yrs; mass  $75.39 \pm 11.57$  kg; height  $177 \pm 0.07$  cm)  
127 participated in the study. All subjects were healthy and gave written informed consent to  
128 participate in the study. The protocol and all testing were approved by the University of North  
129 Carolina at Chapel Hill Institutional Review Board.

130 Subjects completed five walking (1.25 m/s) and five running (2.25 m/s) trials over a  
131 range of incline and decline grades (Fig. 1). Walking trials were at -15%, -10%, 0%, 10%, and  
132 15% and running trials were at -10%, -5%, 0%, 5%, and 10%. The ranges provided an overlap at  
133 the -10%, 0%, and 10% grade for comparison between the two gaits. All experimental trials took  
134 place on a split belt instrumented treadmill capable of incline and negative velocity (Bertec,  
135 Columbus, OH, USA). Decline gait was obtained by inclining the treadmill and reversing the  
136 belt velocity. Walking and running trials each lasted 7 minutes to ensure steady-state metabolic  
137 data. Walking and running trials were pseudorandomized, and once the treadmill incline was set,  
138 all conditions for that grade were completed.

139 Joint kinematic data were recorded using an eight camera motions capture system  
140 (VICON, Oxford, UK) to record the position of 22 reflective markers on the right lower limb and  
141 pelvis. Raw marker positions were filtered using a 2<sup>nd</sup> order, low pass filter with a cut off  
142 frequency of 10 Hz. Segment tracking was performed by placing rigid plates containing clusters  
143 of 3-4 markers on the foot, shank, thigh, and pelvis. Calibration landmarks and relative location  
144 of tracking markers were identified through a standing trial that was performed at the beginning

145 of the trials. The tracking markers were recorded during each trial and the orientation of the  
146 distal segment relative to the proximal segment was used to define the 3D joint angle. Ground  
147 reaction force (GRF) data was captured through the force plates embedded in the instrumented  
148 treadmill (BERTEC, Columbus, OH, USA). GRF data were filtered with a 2<sup>nd</sup> order low pass  
149 Butterworth filters with a cut off frequency of 35 Hz.

150 The GRF and the kinematic data from the individual limbs were used to perform an  
151 inverse dynamics analysis. We performed inverse dynamics at the joint level using commercially  
152 available software (Visual 3D, C-motion, USA). Calculations of the time-varying moment and  
153 power were performed at the ankle, knee, and hip. Average positive and negative power ( $\text{W kg}^{-1}$ )  
154 was calculated for each joint at each condition. Average positive power for each joint over the  
155 stride was calculated by integrating periods of only positive joint power with respect to time.  
156 This positive joint work ( $\text{J kg}^{-1}$ ) was then averaged across all of the strides. Average joint  
157 positive mechanical power was calculated by dividing the average joint positive work by the  
158 average stride time for the trial. The total limb average positive power was calculated by  
159 summing the average positive power at each joint total = hip + knee + ankle). Next, each  
160 individual joint's percent contribution to the total limb average positive power for the stride was  
161 calculated by dividing that joint's average positive power by the total limb average positive  
162 power. The same process was followed to compute stride average negative power, where only  
163 the contribution of negative work at each joint was used. The average net power for each joint  
164 and for the limb was then calculated by summing the positive and negative average power values  
165 at each joint and for the limb.

166 Whole body metabolic energy expenditure was captured using a portable metabolic  
167 system (OXYCON MOBILE, VIASYS Healthcare, Yorba Linda, CA, USA). Rates of oxygen

168 consumption and carbon dioxide production during trials were recorded and converted to  
169 metabolic powers using standard equations [42]. Baseline quiet standing metabolic rate was  
170 captured prior to gait trials. For each condition, respiratory data from minute 4 to 6 were  
171 averaged and used to report the steady state metabolic energy consumptions (watts) for the trial.  
172 The metabolic system reported values that were averaged over 30 second intervals so four values  
173 were averaged for each trial. In the most extreme case of 10% incline running, subjects could not  
174 complete the trial while maintaining a respiratory exchange ratio (RER) below one. Therefore,  
175 only data from 3 out of 7 subjects are included for the 10% incline running condition. Task  
176 dependent metabolic power was calculated by subtracting the metabolic power in standing from  
177 the metabolic power recorded during the trial. These values were then normalized to each  
178 individual's body mass. We then calculated cost of transport (COT) ( $\text{J m}^{-1} \text{kg}^{-1}$ ) by dividing mass  
179 normalized net metabolic power ( $\text{W kg}^{-1}$ ) by walking speed ( $\text{m s}^{-1}$ ):

$$180 \quad COT_{speed,grade} = \frac{P_{met}}{s}$$

181 where  $P_{met}$  is mass normalized net metabolic power, and  $s$  is speed. Additionally, efficiency was  
182 calculated as the ratio of average total limb positive mechanical power to net metabolic power:

$$183 \quad \eta^+ = \frac{P_{mech}^+}{P_{met}}$$

184 where  $\eta^+$  is efficiency of positive work,  $P_{mech}^+$  is the average total limb positive power (summed  
185 across the lower-limb joints), and  $P_{met}$  is mass normalized net metabolic power.

186 For each gait (walk and run), we performed a repeated measures ANOVA (rANOVA, main  
187 effect: grade) to test the effect of grade on stride average joint power of the ankle, knee, and hip.  
188 ( $\alpha = 0.05$ ; JMP Pro, SAS, Cary, NC). In addition, for each gait (walk and run), we performed a



189 repeated measures ANOVA (rANOVA main effect: joint) to evaluate the relative contribution of  
190 each joint at each grade. We applied a post-hoc Tukey HSD (HSD) test to evaluate for  
191 significance between conditions (either grade or joint). Finally, we performed matched pair t-test  
192 to evaluate the effect of gait (walk, run) on the stride average joint power contributions for  
193 similar grades (-10%, 0%, and 10%). We did not run statistical analysis on metabolic data.

## 194 **Results**

### 195 **Mechanical Power in Walking**

196 **Net Power:** The average net mechanical power delivered at the ankle, knee, and hip all  
197 increased with grade (Fig. 2A). The average net power of the ankle increased with grade  
198 (rANOVA,  $p < 0.0001$ ), was negative for decline conditions, and positive for level ground and  
199 incline grades. The average net power of the knee was negative in all conditions except the  
200 +15% grade. The knee was the largest source of net negative power in all conditions, and the  
201 magnitude increased as grade decreased (rANOVA,  $p < 0.0001$ ). The average net power of the  
202 hip was positive in all conditions and increased with grade (rANOVA,  $p < 0.0001$ ). As incline  
203 increased, we observed an increased reliance on the hip for the required net positive power.

204

205 **Figure 2: Percent distribution of average positive and negative lower-limb joint power for walking**  
206 **at 1.25 m s<sup>-1</sup> over a range of grades. (A)** Average net power of each joint across surface grade  
207 conditions for walking. **(B)** The area of each pie is normalized to the average positive power at level  
208 grade for walking (1.02 W kg<sup>-1</sup>).

209 **Positive Power:** The average positive power of the limb (ankle + knee + hip) increased with  
210 increasing grade (rANOVA,  $p < 0.0001$ ) (Table 1; Fig. 2B) from 1.02 W kg<sup>-1</sup> at level to 1.70 W  
211 kg<sup>-1</sup> (HSD,  $p < 0.0001$ ) and 2.60 W kg<sup>-1</sup> (HSD,  $p < 0.0001$ ) at 10% and 15% grades respectively.  
212 Limb positive power was not significantly different from level at -10% and -15% grades  
213 respectively. The positive power of all three joints also increased individually with increased  
214 grade (rANOVA,  $p < 0.0001$ ) (Table 1). However, the relative contribution of the ankle, knee,  
215 and hip to the total positive power of the limb changed with grade due to the unequal modulation  
216 of positive power at each joint for each grade (Table 2; Fig. 2B). In level walking, the ankle was  
217 the largest contributor to positive mechanical power at 44%, followed by 37% from the hip, and  
218 19% from the knee (rANOVA,  $p = 0.0001$ ; HSD,  $p < 0.0001$ ). As grade increased, the percent  
219 contribution of the ankle decreased (rANOVA,  $p < 0.0001$ ) to 34% at 10% grade (HSD,  $p =$   
220 0.0095) and 28% at 15% grade (HSD,  $p < 0.0001$ ) relative to level. Conversely, the percent  
221 contribution of the hip increased with grade (rANOVA,  $p < 0.0001$ ) from 37% at level to 47% at  
222 10% grade (HSD,  $p = 0.0233$ ) and 52% at 15% grade (HSD,  $p < 0.0001$ ). For incline grades, the  
223 relative contribution of the knee to positive power was the smallest (19%) and did not change as  
224 the power was redistributed primarily between ankle and hip. For decline grades, the only  
225 significant shift in percent contribution to positive power was a decrease in the ankle  
226 contribution from 44% at level to 34% at -15% grade (rANOVA,  $p < 0.0001$ ; HSD,  $p = 0.0167$ ).  
227 There was no significant difference in the contribution to positive power among the joints at -  
228 15% grade.

229

230

231

232 **Table 1: Lower-limb joint average mechanical power for walking and running at multiple**  
233 **grades.**

|                                          | Grade (%) | Joint Positive Power (W kg <sup>-1</sup> ) |      |      |       | Joint Negative Power (W kg <sup>-1</sup> ) |       |       |       |
|------------------------------------------|-----------|--------------------------------------------|------|------|-------|--------------------------------------------|-------|-------|-------|
|                                          |           | Ankle                                      | Knee | Hip  | Total | Ankle                                      | Knee  | Hip   | Total |
| <b>Walk</b><br>(1.25 m s <sup>-1</sup> ) | -15       | 0.30                                       | 0.24 | 0.32 | 0.86  | -0.70                                      | -1.62 | -0.28 | -2.60 |
|                                          | -10       | 0.41                                       | 0.22 | 0.30 | 0.94  | -0.60                                      | -0.84 | -0.16 | -1.60 |
|                                          | 0         | 0.45                                       | 0.19 | 0.38 | 1.02  | -0.39                                      | -0.53 | -0.11 | -1.03 |
|                                          | 10        | 0.58                                       | 0.32 | 0.81 | 1.71  | -0.18                                      | -0.45 | -0.08 | -0.71 |
|                                          | 15        | 0.74                                       | 0.50 | 1.36 | 2.60  | -0.15                                      | -0.37 | -0.10 | -0.62 |
| <b>Run</b><br>(2.25 m s <sup>-1</sup> )  | -10       | 1.28                                       | 0.61 | 0.75 | 2.64  | -1.12                                      | -2.40 | -0.37 | -3.88 |
|                                          | -5        | 1.54                                       | 0.69 | 0.91 | 3.14  | -0.98                                      | -1.98 | -0.29 | -3.25 |
|                                          | 0         | 2.01                                       | 0.64 | 1.02 | 3.66  | -1.13                                      | -1.83 | -0.15 | -3.12 |
|                                          | 5         | 2.05                                       | 0.66 | 1.39 | 4.09  | -1.14                                      | -1.57 | -0.16 | -2.86 |
|                                          | 10        | 2.11                                       | 0.79 | 1.63 | 4.53  | -1.07                                      | -1.52 | -0.21 | -2.81 |

234

235

236

237

238

239

240

241

242

243

244

245

246

247 **Table 2: Percent contribution of each joint to total limb power in walking at 1.25 m s<sup>-1</sup>.** A  
 248 repeated measures ANOVA (main effect: grade<sup>##</sup>) tested the effect of grade on stride average  
 249 joint power of the ankle, knee, and hip (# indicates HSD post-hoc comparison to 0% grade). In  
 250 addition, a repeated measures ANOVA (main effect: joint\*) evaluated the relative contribution  
 251 of each joint at each grade. (main effect: joint \**p* = 0.0043; \*\**p* < 0.0001). Pairwise HSD was  
 252 used to evaluate significant differences between joints.

**Joint Positive Power (W kg<sup>-1</sup>)**

| Grade (%) | <u>Ankle</u>                          | <u>Knee</u>                     | <u>Hip</u>                      | <u>Pairwise HSD</u> |                   |                   |
|-----------|---------------------------------------|---------------------------------|---------------------------------|---------------------|-------------------|-------------------|
|           | <sup>##</sup> <i>p</i> < 0.0001       | <sup>##</sup> <i>p</i> = 0.0203 | <sup>##</sup> <i>p</i> < 0.0001 | <i>Ank:Knee</i>     | <i>Ank:Hip</i>    | <i>Hip:Knee</i>   |
| -15       | 34%                                   | 28%                             | 38%                             |                     |                   |                   |
| -10*      | <sup>#</sup> <i>p</i> = 0.0167<br>43% | 25%                             | 32%                             | <i>p</i> = 0.0031   |                   |                   |
| 0**       | 44%                                   | 19%                             | 37%                             | <i>p</i> < 0.0001   |                   | <i>p</i> = 0.0003 |
| 10**      | 34%                                   | 19%                             | 47%                             | <i>p</i> = 0.0001   | <i>p</i> = 0.0009 | <i>p</i> < 0.0001 |
| 15**      | <sup>#</sup> <i>p</i> = 0.0095<br>29% | 19%                             | 52%                             | <i>p</i> = 0.0001   | <i>p</i> < 0.0001 | <i>p</i> < 0.0001 |
|           | <sup>#</sup> <i>p</i> < 0.0001        |                                 | <sup>#</sup> <i>p</i> < 0.0001  |                     |                   |                   |

**Joint Negative Power (W kg<sup>-1</sup>)**

| Grade (%) | <u>Ankle</u>                    | <u>Knee</u>     | <u>Hip</u>                      | <u>Pairwise HSD</u> |                   |                   |
|-----------|---------------------------------|-----------------|---------------------------------|---------------------|-------------------|-------------------|
|           | <sup>##</sup> <i>p</i> = 0.0077 | <sup>##</sup> - | <sup>##</sup> <i>p</i> = 0.0038 | <i>Ank:Knee</i>     | <i>Ank:Hip</i>    | <i>Hip:Knee</i>   |
| -15**     | 28%                             | 11%             | 62%                             | <i>p</i> < 0.0001   | <i>p</i> = 0.0009 | <i>p</i> < 0.0001 |
| -10**     | 41%                             | 9%              | 50%                             |                     | <i>p</i> = 0.0004 | <i>p</i> < 0.0001 |
| 0**       | 38%                             | 11%             | 51%                             | <i>p</i> = 0.0115   | <i>p</i> < 0.0001 | <i>p</i> < 0.0001 |
| 10**      | 27%                             | 11%             | 62%                             | <i>p</i> < 0.0001   | <i>p</i> < 0.0001 | <i>p</i> < 0.0001 |
| 15**      | 24%                             | 16%             | 60%                             | <i>p</i> < 0.0001   |                   | <i>p</i> < 0.0001 |
|           |                                 |                 | <sup>#</sup> <i>p</i> = 0.0433  |                     |                   |                   |

253

254 **Negative Power:** The magnitude of stride average limb negative power decreased with  
255 increasing grade (rANOVA,  $p < 0.0001$ ) from  $-1.03 \text{ W kg}^{-1}$  in level to  $-0.73 \text{ W kg}^{-1}$  at 10% grade  
256 (HSD,  $p = 0.1918$ ) and  $-0.62 \text{ W kg}^{-1}$  at 15% grade (HSD,  $p = 0.0305$ ) (Table 1; Fig. 2B)  
257 Negative limb power was significantly larger in magnitude at  $-1.60 \text{ W kg}^{-1}$  at -10% grade (HSD,  
258  $p = 0.0015$ ) and  $-2.60 \text{ W kg}^{-1}$  at -15% grade (HSD,  $p < 0.0001$ ). The knee contributed  $>50\%$  to  
259 limb negative power, and the percent contribution was greater than that of the hip in all  
260 conditions and that of the ankle in all conditions but the -10% grade (rANOVA,  $p < 0.0001$ ;  
261 HSD,  $p < 0.05$ ) (Table 2; Fig. 2B). The percent contribution of the knee to negative limb power  
262 increased with incline (rANOVA,  $p = 0.0038$ ) from 51% at level to 63% at 10% grade (HSD,  $p =$   
263  $0.0433$ ) and 60% at 15% grade and coincided with a decrease in ankle contribution (rANOVA,  $p$   
264  $= 0.0007$ ). Ankle negative power contribution was maximized for -10% grade at 41%. Hip  
265 contribution to negative power did not change with grade and was 12% on average.  
266

## 267 **Mechanical Power in Running**

268 **Net Power:** Similar to walking, the stride average net power of each joint increased from  
269 negative to positive grade (rANOVA,  $p < 0.0001$ ) (Fig. 3A). The average net power of the ankle  
270 and hip was positive in all conditions and increased in magnitude with increasing grade  
271 (rANOVA,  $p < 0.0001$ ). In contrast, the average net power of the knee was negative in all  
272 conditions and became more negative in large downhill grades (rANOVA,  $p < 0.0001$ ).  
273

274 **Figure 3: Percent distribution of average positive and negative lower-limb joint power for running**  
275 **at  $2.25 \text{ m s}^{-1}$  over a range of grades. (A) Average net power of each joint across surface grade**

276 conditions for running. **(B)** The area of each pie is normalized to the average positive power at level grade  
277 for running ( $3.66 \text{ W kg}^{-1}$ ).

278 **Positive Power:** The average positive power of the limb (ankle + knee + hip) increased with  
279 increasing grade (rANOVA,  $p < 0.0001$ ) (Table 1; Fig. 3B) from  $3.66 \text{ W kg}^{-1}$  at level to  $4.12 \text{ W}$   
280  $\text{kg}^{-1}$  and  $4.53 \text{ W kg}^{-1}$  (HSD,  $p = 0.0005$ ) at 5% and 10% grades respectively. Limb positive power  
281 decreased to  $3.14 \text{ W kg}^{-1}$  at -5%, and to  $2.64 \text{ W kg}^{-1}$  (HSD,  $p < 0.0001$ ) at -10% grade. The ankle  
282 was the dominant source of positive mechanical power ( $>46\%$ ) in all conditions and was  
283 significantly different from the knee (rANOVA,  $p < 0.0001$ ; HSD,  $p < 0.0001$ ) in all conditions  
284 and for the hip in all but the 10% grade (rANOVA,  $p < 0.0001$ ; HSD  $p < 0.0171$ ) (Table 3; Fig.  
285 3B). With increasing incline, ankle positive power percent contribution decreased (rANOVA,  $p$   
286  $= 0.04$ ) from 55% at level to 46% at 10% grade (HSD  $p = 0.0263$ ) while hip contribution  
287 increased (rANOVA,  $p = 0.0032$ ) from 28% to 36% in the level versus 10% grade condition  
288 (HSD,  $p = 0.0051$ ). For decline grades, there was no significant shift in the joint positive power  
289 distribution.

290

291

292

293

294

295

296

297

298 **Table 3: Percent contribution of each joint to total limb power in running at 2.25 m s<sup>-1</sup>.** A  
 299 repeated measures ANOVA (main effect: grade<sup>##</sup>) tested the effect of grade on stride average  
 300 joint power of the ankle, knee, and hip (# indicates HSD post-hoc comparison to 0% grade). In  
 301 addition, a repeated measures ANOVA (main effect: joint\*) evaluated the relative contribution  
 302 of each joint at each grade. (main effect: joint \*\**p* < 0.0001). Pairwise HSD was used to evaluate  
 303 significant differences between joints.

**Joint Positive Power (W kg<sup>-1</sup>)**

| Grade (%) | <u>Ankle</u>                          | <u>Hip</u>                            | <u>Knee</u>                     | <u>Pairwise HSD</u> |                   |                  |
|-----------|---------------------------------------|---------------------------------------|---------------------------------|---------------------|-------------------|------------------|
|           | <sup>##</sup> <i>p</i> = 0.04         | <sup>##</sup> <i>p</i> = 0.0032       | <sup>##</sup> <i>p</i> = 0.1468 | <i>Ank:Knee</i>     | <i>Ank:Hip</i>    | <i>Hip:Knee</i>  |
| -10**     | 48%                                   | 28%                                   | 23%                             | <i>p</i> < 0.0001   | <i>p</i> = 0.0002 |                  |
| -5**      | 49%                                   | 29%                                   | 22%                             | <i>p</i> < .0001    | <i>p</i> = .0023  |                  |
| 0**       | 55%                                   | 28%                                   | 17%                             | <i>p</i> < .0001    | <i>p</i> < .0001  | <i>p</i> = .0197 |
| 5**       | 50%                                   | 33%                                   | 16%                             | <i>p</i> < .0001    | <i>p</i> = .0171  | <i>p</i> = .0186 |
| 10**      | 46%<br><sup>#</sup> <i>p</i> = 0.0263 | 36%<br><sup>#</sup> <i>p</i> = 0.0051 | 18%                             | <i>p</i> < .0001    | <i>p</i> = .0013  |                  |

**Joint Negative Power (W kg<sup>-1</sup>)**

| Grade (%) | <u>Ankle</u>                    | <u>Hip</u>                      | <u>Knee</u>                     | <u>Pairwise HSD</u> |                  |                  |
|-----------|---------------------------------|---------------------------------|---------------------------------|---------------------|------------------|------------------|
|           | <sup>##</sup> <i>p</i> = 0.0027 | <sup>##</sup> <i>p</i> = 0.1109 | <sup>##</sup> <i>p</i> = 0.0094 | <i>Ank:Knee</i>     | <i>Ank:Hip</i>   | <i>Hip:Knee</i>  |
| -10**     | 28%                             | 10%                             | 62%                             | <i>p</i> < .0001    | <i>p</i> = .0003 | <i>p</i> < .0001 |
| -5**      | 31%                             | 9%                              | 60%                             | <i>p</i> < .0001    | <i>p</i> < .0001 | <i>p</i> < .0001 |
| 0**       | 36%                             | 5%                              | 59%                             | <i>p</i> < .0001    | <i>p</i> < .0001 | <i>p</i> < .0001 |
| 5**       | 41%                             | 5%                              | 54%                             | <i>p</i> = .0495    | <i>p</i> < .0001 | <i>p</i> < .0001 |
| 10**      | 38%                             | 8%                              | 54%                             | <i>p</i> < .0001    | <i>p</i> < .0001 |                  |

304

305 **Negative Power:** The magnitude of limb negative power in running decreased with grade  
306 (rANOVA,  $p < 0.0001$ ) from  $-3.12 \text{ W kg}^{-1}$  at level to  $-2.86 \text{ W kg}^{-1}$  and  $-2.81 \text{ W kg}^{-1}$  at 5% and  
307 10% grade (Table 1; Fig. 3B). The limb negative power magnitude increased to  $-3.25 \text{ W kg}^{-1}$  for  
308 -5% and to  $-3.88 \text{ W kg}^{-1}$  for -10% grade (HSD,  $p = 0.0002$ ). Similar to walking, each joint  
309 contributed different amounts to total limb average negative power (rANOVA  $p < 0.0001$ )  
310 (Table 3; Fig. 3B). The knee was the dominant source of negative power, producing  $>54\%$  for all  
311 conditions and contributed significantly more than the ankle or hip (HSD  $p < 0.0001$ ). The ankle  
312 contributed approximately 35% of the stride average negative power across all grades and the hip  
313 contribution was minimal ( $\sim 7\%$ ).

## 314 **Comparisons of Walking to Running**

315 The average limb positive power was greater in running than walking. Switching from  
316 walking to running on level ground resulted in an increase in the ankle's percent contribution  
317 from 44% to 55% (paired t-test  $p = 0.0024$ ) and a decrease in the hip's percent contribution from  
318 37% to 28% (paired t-test  $p = 0.0196$ ). The trend was similar at 10% grade, where switching  
319 from walking to running resulted in an increase in the ankle's percent contribution from 34% to  
320 46% (paired t-test  $p = 0.0024$ ) and a decrease in the hip's percent contribution from 47% to 36%  
321 (paired t-test  $p = 0.0196$ ). The transition from walking to running at the 10% grade resulted in  
322 the hip being replaced by the ankle as the dominant contributor to positive power. For negative  
323 power at the 10% grade, switching from walking to running resulted in an increase in the ankle's  
324 percent negative contribution from 27% to 38% (paired t-test  $p = 0.001$ ) and a decrease in the  
325 knee's percent contribution from 62% to 54% (paired t-test  $p = 0.0338$ ).



## 326 **Temporal component of power redistribution**

327 Time series plots show the redistribution of joint moment and power over the stride cycle  
328 for walking (Fig. 4) and running (Fig. 5). Again, the general trend was a shift in positive power  
329 generation to the hip with increasing incline, while the knee was the primary site of negative  
330 work (i.e., absorption). Changes in ankle positive power were predominantly seen at push-off  
331 (~60% stride), with changes in the knee negative power and hip positive power coming in initial  
332 stance.

333

334 **Figure 4: Ankle, knee, and hip joint kinetics for walking at 1.25 ms<sup>-1</sup>.** Body-mass specific (A) joint  
335 moment (Nm kg<sup>-1</sup>) and (B) joint power (W kg<sup>-1</sup>) over a stride from heel strike (0%) to heel strike (100%)  
336 of the same leg for walking across surface grades from -15% downhill to +15% uphill.

337

338 **Figure 5: Ankle, knee and hip joint kinetics for running at 2.25 ms<sup>-1</sup>.** Body mass-specific (A) joint  
339 moment (Nm kg<sup>-1</sup>) and (B) joint power (W kg<sup>-1</sup>) over a stride from heel strike (0%) to heel strike (100%)  
340 of the same leg for running across surface grades from at -10% downhill to +10% uphill.

341

## 342 **Metabolic Energy Demand**

343 In walking, the measured metabolic minimum was at -10% grade (1.5 W kg<sup>-1</sup>) (Table 4).  
344 For running, the metabolic minimum was also at -10% grade (5.75 W kg<sup>-1</sup>) which was the  
345 steepest downhill grade tested in running. Efficiency of positive work was maximized at -10%  
346 grade in walking with an efficiency of 0.62.

347

348 **Table 4: Net metabolic power, summed (ankle +knee +hip) lower-limb joint average positive power,**  
 349 **efficiency of positive joint work, and cost of transport for walking and running up and downhill.**

|                                          | Grade (%) | $P_{MET}$ (W kg <sup>-1</sup> ) | $P^+$ (W kg <sup>-1</sup> ) | $\eta^+_{WORK}$ | COT (J kg <sup>-1</sup> m <sup>-1</sup> ) |
|------------------------------------------|-----------|---------------------------------|-----------------------------|-----------------|-------------------------------------------|
| <b>Walk</b><br>(1.25 m s <sup>-1</sup> ) | -15       | 2.24                            | 0.86                        | 0.38            | 1.79                                      |
|                                          | -10       | 1.50                            | 0.94                        | 0.62            | 1.20                                      |
|                                          | 0         | 2.82                            | 1.02                        | 0.36            | 2.25                                      |
|                                          | 10        | 6.15                            | 1.71                        | 0.28            | 4.92                                      |
|                                          | 15        | 10.54                           | 2.60                        | 0.25            | 8.43                                      |
| <b>Run</b><br>(2.25 m s <sup>-1</sup> )  | -10       | 5.75                            | 2.64                        | 0.46            | 2.55                                      |
|                                          | -5        | 7.32                            | 3.14                        | 0.43            | 3.25                                      |
|                                          | 0         | 9.09                            | 3.66                        | 0.40            | 4.04                                      |
|                                          | 5         | 11.64                           | 4.09                        | 0.35            | 5.17                                      |
|                                          | 10        | 14.37                           | 4.53                        | 0.32            | 6.39                                      |

350

## 351 **Discussion**

352 Our aim in this study was to measure and analyze human biomechanical response during  
 353 walking and running on sloped surfaces in order to build a roadmap to help guide development  
 354 of lower-limb wearable robots capable of adjusting to changing mechanical demands in real-  
 355 world environments. We characterized the distribution of positive and negative mechanical  
 356 power output across the lower-limb joints for incline and decline grades during walking and  
 357 running. Our results confirm and are supported by previous studies demonstrating that the  
 358 energetic demands of the lower limbs heavily depend on both ground slope and gait [31-41, 43-  
 359 46]. Energy must be injected or extracted to raise or lower the potential energy of the center of  
 360 mass (COM) for incline/decline walking.[29, 30]. Indeed, our data confirm that in both walking  
 361 and running gait, the stride average total limb (ankle + knee + hip) power changes from net  
 362 negative on decline grades to net positive on incline grades. Our findings also agree with  
 363 previous work demonstrating the ankle to be a dominant source of positive mechanical power

364 during both level walking and running gait [47], but that for incline walking the hip becomes an  
365 important source of positive mechanical power generation [31, 34, 35]. In addition, our data  
366 confirm that the knee is the dominant source of mechanical energy absorption during both  
367 walking and running across grades [38]. In the following sections we first discuss the  
368 biomechanical implications of our results and then focus on how these data could be utilized to  
369 create lower-limb wearable exoskeletons (or perhaps prostheses) that can respond to and perhaps  
370 even take advantage of changing mechanical demands across grades and gaits.

### 371 **Relationship between structure and function across task demand**

372 The functional role of the ankle and the hip across grades aligns with the physiological structure  
373 of each joint's muscle-tendon units (MTs). The hip MTs have short tendons and long muscle  
374 fascicles with low pennation [48]. In contrast, the structure of the ankle plantarflexor MTs,  
375 comprises relatively short, pennate muscle fibers in series with long compliant tendons. Added  
376 compliance in distal MTs make them ideal for storage and return of elastic energy during the  
377 gait cycle [48-50]. In incline gait, mechanical energy must be added to the body. Prior studies  
378 suggest that the structure of the MTs in the more proximal joints (*i.e.*, hip) may be better suited  
379 to performing work on the COM because short, stiff tendons can directly transmit the work of  
380 the muscles to power the joint [48]. Furthermore, long muscle fascicles allow for production of  
381 force over a relatively larger range of motion and are important in incline walking due to larger  
382 joint range of motion.

383 In line with the idea that structure drives function, our walking data demonstrate a shift to  
384 power output in more proximal joints with an increase in incline. This finding is similar to prior  
385 studies which also show the dominant source of positive mechanical power shifts from the ankle

386 to the hip in uphill walking [22, 32]. On the contrary, we found no evidence of a redistribution  
387 of positive work to the hip during uphill running. In running, the ankle still produced 46% of the  
388 positive power at 10% uphill grade. This finding seems to be in contrast with a previous study  
389 which showed that the hip contributed most to the increase in work for incline running [31].  
390 However, our results may differ due to the different grade (6° and 12°), faster speed (3.0 and 3.5  
391 m s<sup>-1</sup>), and lack of treadmill use in [31]. Interestingly, the ankle also performed a significantly  
392 higher percentage of the negative work in uphill running at 10% grade when compared to the  
393 level. This trend suggests that energy cycling through elastic mechanisms may still be an  
394 important feature retained in uphill running [51]. Due to the need for faster acceleration of the  
395 body in uphill running, ankle joint elasticity may facilitate higher peak powers and more net  
396 work output from the plantarflexors[48] by decreasing the required shortening velocity of the  
397 muscle fascicles of the ankle. Indeed, *in vivo* studies where ultrasound images of the triceps  
398 surae were taken in running and walking showed series elastic tissues allow the muscles to  
399 operate at lower average shortening velocities and that elastic recoil contributes substantially to  
400 positive work [28]. Additional *in vivo* studies of human muscle function, especially at proximal  
401 joints, in uphill and downhill walking and running would shed light on how MT architecture  
402 interacts with task demand for mechanical power generation /dissipation.

### 403 **Balance of positive and negative power varies across joint and grade**

404 Net mechanical power production of the limb was governed by a balance between positive and  
405 negative power output that varied from joint to joint. The hip's contribution to walking and  
406 running on sloped surfaces was net positive across all grades and gaits we tested and was  
407 modulated predominantly by changes in production of positive power (Tables 1-3, Figs. 2, 3).

408 Despite large adjustments in net positive power output across grades, the hip was not the largest  
409 absolute contributor of positive power in most conditions (except incline walking). This was  
410 because the hip contributes very small amounts of negative power across conditions.

411 Conversely, the knee net power output was modulated predominantly by adjusting the  
412 production of negative power. In fact, the knee was the dominant contributor (>50%) to negative  
413 power across all grades in both walking and running. In all except the highest incline walking  
414 grade, the knee produced more negative than positive power, resulting in negative net power.

415 At the ankle, adjustments in lower-limb joint power production across grade/gait were  
416 more balanced in comparison to the hip (positive work modulated) and knee (negative work  
417 modulated). The average net power of the ankle was generated by adjustments to both positive  
418 and negative power across grade and gait. (Table 1, Figs. 2, 3) In level walking, the net power  
419 from the ankle was smaller than the hip despite the larger contribution to positive power from the  
420 ankle (Tables 1&2, Fig. 2). During incline walking, the ankle's percent contribution to both  
421 positive and negative power decreased, potentially reflecting a reduced capacity to store and  
422 return elastic energy in the Achilles tendon. In decline walking, we observed the opposite trend  
423 where ankle net power was negative reflecting an increased capacity to store energy. In running,  
424 the ankle was the dominant source of positive mechanical power across all grades and the net  
425 power of the ankle was positive for all grades. (Table 1, 3, Fig. 3).

## 426 **Metabolic power and efficiency**

427 Similar to Margaria *et al.* [30], we found that the greatest efficiency of positive work at -  
428 10% slope for both walking and running. Additionally, the efficiency of positive work during

429 walking at the extreme uphill (+15%) was  $\sim 0.25$  reflecting the efficiency of muscle-tendons  
430 during tasks exhibiting predominantly positive work [29, 52-55].

## 431 **Implications for lower-limb exoskeleton development**

432 How the biological system distributes power across the joints in a variety of gait  
433 conditions has important implications for development of wearable assistive devices. To develop  
434 a roadmap for lower-limb exoskeleton design, we first define three main modes of operation: 1)  
435 (Net +) Energy injection – the device adds mechanical energy to the gait cycle using external  
436 sources of energy; 2) (Net -) Energy extraction – the device removes mechanical energy from the  
437 gait cycle to be dissipated as heat or stored (*e.g.*, as mechanical energy in a spring or electrical  
438 energy in a battery); 3) (Net 0) Energy transfer – the device extracts energy at one time during  
439 gait and then injects it within or across joints at some time later (Fig. 6). With these modes the  
440 energy which is added, removed, or transferred may have different effects on the user's  
441 biological and total joint power outputs, and, while most studies have a goal in mind (*e.g.*, reduce  
442 biological moments and powers), the effects are often non-intuitive and hard to predict. Because  
443 the effect of an assistive device on the user is heavily dependent on the individual user's  
444 biomechanical response, we further propose and discuss three potential biomechanical outcomes  
445 resulting from any of these modes of operation. The magnitude of the user's biological joint  
446 power could: O1) decrease (=replacement) O2) remain constant (=augmentation), or O3)  
447 increase (=enhancement). Here, we offer several examples that span the possible physiological  
448 response outcomes (O1-3) for devices that inject positive power, but the same principles also  
449 apply for the other device modes as well (*i.e.*, extraction and transfer).

450

451 **Figure 6: Potential mechanisms for exoskeleton energy exchange. (A)** Example of energy cycle for a  
452 joint where negative joint power (red) is followed by positive joint power (blue) similar to the ankle  
453 power cycle during gait. **(B)** The exoskeleton (green) produces positive power and injects energy at the  
454 joint during the positive power phase of the gait via a motor or some other energy source. (Top) The  
455 positive bio power is reduced such that the total (bio+exo) positive power output of the joint remains the  
456 same (*i.e.*, replacement). (Bottom) The additional energy increases the total (bio+exo) positive power  
457 output of the joint (*i.e.*, augmentation). This is the most common mode employed on powered  
458 exoskeletons [3, 6, 7, 14, 17]. **(C)** The exoskeleton (green) produces negative power and extracts energy  
459 from the joint during the negative power phase of the gait via a damper or some other energy sink and, in  
460 this example, the user maintains the total (exo+ bio) negative power output of the joint, enabling a  
461 reduced biological contribution (*i.e.*, replacement). In this mode, the exoskeleton negative power could  
462 drive an electrical generator and energy could be stored in a battery or used to power electronic devices  
463 [18, 56, 57]. If the negative power is normally recycled within the body and transferred to the positive  
464 power phase, additional biological power may be required to maintain biological positive power output  
465 (Bio<sup>Add</sup>). **(D-F)** The exoskeleton (green) could also operate in transfer mode by sequencing extraction and  
466 injection phases within or across the joints over time. **(D)** In the simplest case the exoskeleton stores  
467 energy during the negative power phase and returns it immediately to the same joint (*e.g.*, with a spring)  
468 and, in this example, the user maintains the total joint power output enabling a reduction in both  
469 biological positive and negative power (=replacement) [5]. Other variants on transfer mode include: **(E)**  
470 The exoskeleton extracts energy at one joint (similar to C) and then immediately injects it at another  
471 (similar to B) [2]. **(F)** The exoskeleton extracts energy at one joint (*e.g.*, with a spring or generator),  
472 temporarily stores it (*e.g.*, using a battery or a clutch) and then after some delay injects it at the same joint  
473 (*e.g.*, using a motor powered by the battery or spring recoil on release of a clutch).

474 **Energy Injection:** The first mode of device operation entails adding positive mechanical  
475 work at a joint(s) when the joint is producing positive power. This is the most prevalent strategy

476 used in exoskeletons targeting the hip, knee, and ankle with the common desired goal being the  
477 reduction of metabolic demand in healthy individuals [3, 6-8, 14, 17, 23, 58]. The common  
478 expectation is the outcome where the addition of mechanical power causes a concomitant  
479 reduction of biological power while total power mostly remains constant (O1: replacement).  
480 While it's been demonstrated that users will reduce biological moment such that the total joint  
481 moment remains invariant [59, 60], reductions in biological power often do not reflect full  
482 replacement [17, 61]. Thus, unlike what might be desired, the second physiological response  
483 outcome is often observed. Here, the biological power is reduced by less than the exoskeleton  
484 injects and the magnitude of the total joint power is increased (O2: augmentation) (Fig. 6B) [7].  
485 [17, 61]. The third physiological response outcome is that the addition of exoskeleton positive  
486 power causes an enhancement of the biological power (O3: enhancement). It is possible that  
487 when injecting positive exoskeleton power, the user actually increases their biological power  
488 output and thus enhances the total joint power beyond the exoskeleton's contribution. So far, we  
489 are not aware of cases where this physiological response has occurred, but it would be desirable  
490 for assistive and rehabilitative technology intended to improve function in clinical populations  
491 with baseline deficits in limb and joint power output (*e.g.*, post-stroke) [62]. For example, the  
492 addition of positive power during push-off may help promote the recruitment of weak  
493 plantarflexors in stroke survivors or older adults. Studies have begun to demonstrate the potential  
494 for enhancing performance in clinical populations by providing positive power to the ankle [26,  
495 63], however the actual effect on biological power is still unclear.

496         How might an engineer use employ the roadmap offered by this study to guide the  
497 strategy for exoskeleton positive power injection beyond level walking? The most notable  
498 example comes from the observed shift to hip dominated positive power in walking uphill (Figs.



499 2, 4). Given limited power supply of the device, our data would suggest that assistance should be  
500 redirected away from the ankle to the hip when transitioning to incline walking. Conversely, for  
501 running (Figs. 3,5), the ankle is the largest contributor to positive average power across *all* slopes  
502 and thus, shifting assistance to the hip may not be as beneficial.

503 **Energy Extraction:** The second mode of device operation involves removing negative  
504 mechanical work at a joint(s) when the joint is producing negative power. The extracted  
505 mechanical energy could be dissipated as heat (*e.g.*, in a damper) or harvested to generate  
506 electricity which can then be stored in a battery or used to power electronic devices (Fig. 6C).  
507 Additionally, an exoskeleton that effectively extracts energy from the gait cycle can potentially  
508 reduce the negative power required from muscles which, unlike many mechanical systems,  
509 require energy to elongate under load [64]. Similar to the effects from injecting positive power,  
510 generation negative power with exoskeletons may have a range of effects on the biological  
511 system that can be non-intuitive. For example, if an exoskeleton offloads a portion of the  
512 negative biological power at a joint, and that power was derived from stored energy in elastic  
513 tissues which can no longer be returned, it is possible that additional biological power may need  
514 to be generated in the positive phase to make up for lost energy stores (Fig. 6C). However, in the  
515 nominal case where the negative biological power is merely dissipated as heat rather than  
516 recycled, then the reduction in total power during the latter half of the cycle may not be  
517 problematic.

518         The knee has been the focus of energy harvesting exoskeletons due to its production of  
519 substantial negative power in gait, especially near the end of swing phase of walking (Fig. 4).  
520 There are several indications that if done correctly it is possible to generate electrical energy  
521 while reducing the muscle energetic demands and whole body metabolic cost [18, 56, 65, 66].

522 With consideration to changing mechanical demands on slopes surfaces, our results suggest  
523 enormous potential for harvesting energy using a knee exoskeleton during decline walking due to  
524 large increases in knee negative power throughout the gait cycle (Figs. 2, 4). In running, a knee  
525 exoskeleton may be widely versatile because the knee generates a large amount of negative  
526 power across all slopes including on inclines (Figs. 3, 5).

527 Although the ankle produces substantial negative power, harvesting exoskeletons might  
528 be ineffective in level gait because much of the joint power is recycled in elastic tissues [28], and  
529 thus as mentioned previously, the biological system would need to replace these losses with  
530 costly muscle work during a positive power phase at some joint in the limb. However, because  
531 ankle negative power increases and positive power decreases on declined surfaces (Fig. 2),  
532 energy harvesting may be a viable candidate at the ankle for decline walking.

533 **Energy Transfer:** The third mode of device operation is to transfer energy from one phase to  
534 another across the gait cycle either within or across joints (Fig. 6D-F). In this mode, because the  
535 exoskeleton extracts energy in the negative phase (*e.g.*, Fig. 6C) and then injects the same energy  
536 later (*e.g.*, Fig. 6B) in a positive phase, external power consumption of the device can be  
537 minimized (*e.g.*, by using passive elements like springs and clutches) [67]. In addition, intra-joint  
538 transfer of energy from a negative power phase to a positive power phase may help mitigate the  
539 complication of the reduced biological power in the latter half of the power cycle. As depicted in  
540 Figure 5D, it is possible that the total power output of the joint (exo+bio) remains constant  
541 despite the reduction of biological power in both the negative and positive power phases. The  
542 simplest device applying this mode of operation is an elastic exoskeleton that uses a spring in a  
543 parallel with the biological plantarflexors to stores energy (negative biological power) which is  
544 returned later in stance (positive biological power) as done by Collins, Wiggins, and Sawicki [5].

545 According to our data here, while this approach of storing and returning energy at the ankle can  
546 be effective for level ground gaits, at other grades the strategy of immediate storage and return of  
547 mechanical energy may not be as effective. Adding a spring in parallel on inclines or declines  
548 would likely require an additional biological energy source to inject/extract energy elsewhere in  
549 the gait. Another option is to transfer power across joints as depicted in Figure 5E (*i.e.*, inter-  
550 joint transfer). One example is the storage of energy from knee deceleration in late swing and  
551 releasing it at the ankle during push-off [2]. From our data, we additionally show that energy  
552 storage in the knee during early stance and releasing it at the ankle during push-off becomes  
553 increasingly viable with decreasing grade (Figs. 4, 5). A final scenario is that the power from the  
554 negative phase could be temporarily stored via battery or clutch and returned at a later time – an  
555 approach that has been used within a single gait cycle in foot-ankle prosthesis designs [68, 69].  
556 This last approach, extraction, storage, and then delayed release (Fig. 6F) opens up the  
557 possibility to store energy over multiple cycle, perhaps accumulating it, and then return it in a  
558 single large burst over a shorter time period to achieve power amplification that may be  
559 necessary for on-off accelerations or maximum effort jumps [70].

## 560 **Conclusions:**

561 Locomotion in the ‘real-world’ involves adjusting speed, changing gait from walk to run  
562 and moving up or downhill. The purpose of this study was to characterize changes in lower-limb  
563 joint kinetics for walking and running over a range of ground slopes. Specifically, we sought to  
564 understand how each joint contributed to total limb positive, negative, and net power output in  
565 order to guide development of exoskeleton actuation schemes capable of handling ‘real-world’  
566 mechanical demands. Results of limb-joint level energy analyses motivated us to define three

567 operating modes that exoskeletons could employ: 1) Energy injection: Addition of positive  
568 power during positive joint power phases, 2) Energy extraction: Removal of negative power (*i.e.*,  
569 energy harvesting) during negative joint power phase. 3) Energy transfer: extracting energy from  
570 one phase and injecting it in another phase at some time later. It's important to note that we have  
571 developed this framework for exoskeletons which operate in parallel with biological muscles and  
572 tendons. The guide for development may be different for prostheses which operate in series with  
573 biological structures and aim to emulate or fully replace biological joint function [71].

574 An important next step is to examine whether using biological patterns of joint power  
575 output as a 'road-map' to apply the three exoskeleton operating modes can improve walking and  
576 running performance (*e.g.*, reduced metabolic cost) on fixed or time varying uphill and downhill  
577 slopes.

## 578 **Acknowledgements**

579 We would like to thank Moran Gad for his help with the calculation of the inverse dynamics and  
580 Karl Zelik for multiple discussions that contributed to aspects of the content in Figure 5.

581

## 582 **Funding**

583 Supported by Grant 2011152 from the United States-Israel Binational Science Foundation to  
584 G.S.S. and R.R and U.S. Army Natick Soldier Research, Development and Engineering Center  
585 (W911QY18C0140) to G.S.S.

586

## 587 **Authors' contributions:**

588 GSS, DJF and RR conceived of the study, and designed the experimental protocol. DJF, KZT  
589 and RWN carried out experiments. DJF, SM, KZT and RWN analyzed data. RWN drafted the  
590 manuscript. GSS, DJF, KZT, RWN, and RR edited the manuscript. All authors gave final  
591 approval for publication.

592

### 593 **Availability of data and material**

594 Source data from this study in .mat and .txt format and an associated readme.txt for navigating it  
595 are available for download at: <http://pwp.gatech.edu/hpl/archival-data-from-publications/>

596

## 597 **References:**

- 598 1. Beck ON, Punith LK, Nuckols RW, Sawicki GS. Exoskeletons Improve Locomotion Economy  
599 by Reducing Active Muscle Volume. *Exercise and sport sciences reviews*. 2019;47(4):237-45.
- 600 2. Malcolm P, Derave W, Galle S, De Clercq D. A simple exoskeleton that assists plantarflexion can  
601 reduce the metabolic cost of human walking. *PloS one*. 2013;8(2):e56137. doi:  
602 10.1371/journal.pone.0056137 [doi].
- 603 3. Mooney LM, Rouse EJ, Herr HM. Autonomous exoskeleton reduces metabolic cost of human  
604 walking. *J Neuroeng Rehabil*. 2014;11:151. Epub 2014/11/05. doi: 10.1186/1743-0003-11-151.  
605 PubMed PMID: 25367552; PubMed Central PMCID: PMC4236484.
- 606 4. Galle S, Malcolm P, Derave W, De Clercq D. Enhancing performance during inclined loaded  
607 walking with a powered ankle-foot exoskeleton. *Eur J Appl Physiol*. 2014;114(11):2341-51. Epub  
608 2014/07/30. doi: 10.1007/s00421-014-2955-1. PubMed PMID: 25064193.
- 609 5. Collins SH, Wiggin MB, Sawicki GS. Reducing the energy cost of human walking using an  
610 unpowered exoskeleton. *Nature*. 2015. doi: 10.1038/nature14288 [doi].

- 611 6. Zhang J, Fiers P, Witte KA, Jackson RW, Poggensee KL, Atkeson CG, et al. Human-in-the-loop  
612 optimization of exoskeleton assistance during walking. *Science*. 2017;356(6344):1280-4. Epub  
613 2017/06/24. doi: 10.1126/science.aal5054. PubMed PMID: 28642437.
- 614 7. Koller JR, Jacobs DA, Ferris DP, Remy CD. Learning to walk with an adaptive gain proportional  
615 myoelectric controller for a robotic ankle exoskeleton. *J Neuroeng Rehabil*. 2015;12(1):97. Epub  
616 2015/11/06. doi: 10.1186/s12984-015-0086-5. PubMed PMID: 26536868; PubMed Central  
617 PMCID: PMC4634144.
- 618 8. Sawicki GS, Beck ON, Kang I, Young AJ. The exoskeleton expansion: improving walking and  
619 running economy. *Journal of NeuroEngineering and Rehabilitation*. 2020;17(1):25. doi:  
620 10.1186/s12984-020-00663-9.
- 621 9. Nuckols RW, Dick TJM, Beck ON, Sawicki GS. Ultrasound imaging links soleus muscle  
622 neuromechanics and energetics during human walking with elastic ankle exoskeletons. *Scientific*  
623 *reports*. 2020;10(1):3604. Epub 2020/02/29. doi: 10.1038/s41598-020-60360-4. PubMed PMID:  
624 32109239; PubMed Central PMCID: PMC7046782.
- 625 10. Nuckols RW SG. Impact of elastic ankle exoskeleton stiffness on neuromechanics and energetics  
626 of human walking across multiple speeds. In Review at *Journal of Neuroengineering and*  
627 *Rehabilitation*. 2020. doi: <https://dx.doi.org/10.21203/rs.2.20510/v1>.
- 628 11. Lee S, Kim J, Baker L, Long A, Karavas N, Menard N, et al. Autonomous multi-joint soft exosuit  
629 with augmentation-power-based control parameter tuning reduces energy cost of loaded walking.  
630 *Journal of neuroengineering and rehabilitation*. 2018;15(1):66. doi: 10.1186/s12984-018-0410-y.
- 631 12. Nasiri R, Ahmadi A, Ahmadabadi MN. Reducing the Energy Cost of Human Running Using an  
632 Unpowered Exoskeleton. *IEEE Transactions on Neural Systems and Rehabilitation Engineering*.  
633 2018;26(10):2026-32.
- 634 13. Zhang J, Cheah CC, Collins SH, editors. Experimental comparison of torque control methods on  
635 an ankle exoskeleton during human walking. *Robotics and Automation (ICRA), 2015 IEEE*  
636 *International Conference on*; 2015: IEEE.

- 637 14. Sawicki GS, Ferris DP. Mechanics and energetics of level walking with powered ankle  
638 exoskeletons. *J Exp Biol.* 2008;211(Pt 9):1402-13. Epub 2008/04/22. doi: 10.1242/jeb.009241.  
639 PubMed PMID: 18424674.
- 640 15. Galle S, Derave W, Bossuyt F, Calders P, Malcolm P, De Clercq D. Exoskeleton plantarflexion  
641 assistance for elderly. *Gait Posture.* 2017;52:183-8. Epub 2016/12/05. doi:  
642 10.1016/j.gaitpost.2016.11.040. PubMed PMID: 27915222.
- 643 16. Galle S, Malcolm P, Collins SH, De Clercq D. Reducing the metabolic cost of walking with an  
644 ankle exoskeleton: interaction between actuation timing and power. *J Neuroeng Rehabil.*  
645 2017;14(1):35. Epub 2017/04/30. doi: 10.1186/s12984-017-0235-0. PubMed PMID: 28449684;  
646 PubMed Central PMCID: PMC5408443.
- 647 17. Quinlivan B, Lee S, Malcolm P, Rossi D, Grimmer M, Siviyy C, et al. Assistance magnitude  
648 versus metabolic cost reductions for a tethered multiarticular soft exosuit. *Science Robotics.*  
649 2017;2(2):eaah4416.
- 650 18. Donelan JM, Li Q, Naing V, Hoffer JA, Weber DJ, Kuo AD. Biomechanical energy harvesting:  
651 generating electricity during walking with minimal user effort. *Science.* 2008;319(5864):807-10.  
652 Epub 2008/02/09. doi: 10.1126/science.1149860. PubMed PMID: 18258914.
- 653 19. Ding Y, Galiana I, Asbeck AT, Quinlivan B, De Rossi SMM, Walsh C, editors. Multi-joint  
654 actuation platform for lower extremity soft exosuits. *Robotics and automation (ICRA), 2014*  
655 *IEEE international conference on; 2014: IEEE.*
- 656 20. Ding Y, Panizzolo FA, Siviyy C, Malcolm P, Galiana I, Holt KG, et al. Effect of timing of hip  
657 extension assistance during loaded walking with a soft exosuit. *J Neuroeng Rehabil.*  
658 2016;13(1):87. Epub 2016/10/08. doi: 10.1186/s12984-016-0196-8. PubMed PMID: 27716439;  
659 PubMed Central PMCID: PMC5048481.
- 660 21. Ding Y, Kim M, Kuindersma S, Walsh CJ. Human-in-the-loop optimization of hip assistance  
661 with a soft exosuit during walking. *Science Robotics.* 2018;3(15):eaar5438.

- 662 22. Sawicki GS, Ferris DP. Mechanics and energetics of incline walking with robotic ankle  
663 exoskeletons. *J Exp Biol.* 2009;212(Pt 1):32-41. Epub 2008/12/18. doi: 10.1242/jeb.017277.  
664 PubMed PMID: 19088208.
- 665 23. Mooney LM, Rouse EJ, Herr HM. Autonomous exoskeleton reduces metabolic cost of human  
666 walking during load carriage. *J Neuroeng Rehabil.* 2014;11:80. Epub 2014/06/03. doi:  
667 10.1186/1743-0003-11-80. PubMed PMID: 24885527; PubMed Central PMCID:  
668 PMC4036406.
- 669 24. Kuo AD, Donelan JM, Ruina A. Energetic consequences of walking like an inverted pendulum:  
670 step-to-step transitions. *Exerc Sport Sci Rev.* 2005;33(2):88-97. Epub 2005/04/12. doi:  
671 10.1097/00003677-200504000-00006. PubMed PMID: 15821430.
- 672 25. Takahashi KZ, Lewek MD, Sawicki GS. A neuromechanics-based powered ankle exoskeleton to  
673 assist walking post-stroke: a feasibility study. *J Neuroeng Rehabil.* 2015;12(1):23. Epub  
674 2015/04/19. doi: 10.1186/s12984-015-0015-7. PubMed PMID: 25889283; PubMed Central  
675 PMCID: PMC4367918.
- 676 26. Awad LN, Bae J, O'Donnell K, De Rossi SMM, Hendron K, Sloop LH, et al. A soft robotic  
677 exosuit improves walking in patients after stroke. *Science translational medicine.* 2017;9(400).  
678 Epub 2017/07/28. doi: 10.1126/scitranslmed.aai9084. PubMed PMID: 28747517.
- 679 27. Ishikawa M, Komi PV, Grey MJ, Lepola V, Bruggemann GP. Muscle-tendon interaction and  
680 elastic energy usage in human walking. *J Appl Physiol (1985).* 2005;99(2):603-8. Epub  
681 2005/04/23. doi: 10.1152/japplphysiol.00189.2005. PubMed PMID: 15845776.
- 682 28. Farris DJ, Sawicki GS. Human medial gastrocnemius force-velocity behavior shifts with  
683 locomotion speed and gait. *Proc Natl Acad Sci U S A.* 2012;109(3):977-82. Epub 2012/01/06.  
684 doi: 10.1073/pnas.1107972109. PubMed PMID: 22219360; PubMed Central PMCID:  
685 PMC3271879.



- 686 29. Minetti AE, Moia C, Roi GS, Susta D, Ferretti G. Energy cost of walking and running at extreme  
687 uphill and downhill slopes. *Journal of applied physiology* (Bethesda, Md: 1985).  
688 2002;93(3):1039-46. doi: 10.1152/jappphysiol.01177.2001 [doi].
- 689 30. Margaria R, Cerretelli P, Aghemo P, Sassi G. Energy cost of running. *J Appl Physiol*.  
690 1963;18:367-70. Epub 1963/03/01. doi: 10.1152/jappl.1963.18.2.367. PubMed PMID: 13932993.
- 691 31. Roberts TJ, Belliveau RA. Sources of mechanical power for uphill running in humans. *J Exp*  
692 *Biol*. 2005;208(Pt 10):1963-70. Epub 2005/05/10. doi: 10.1242/jeb.01555. PubMed PMID:  
693 15879076.
- 694 32. Lay AN, Hass CJ, Gregor RJ. The effects of sloped surfaces on locomotion: a kinematic and  
695 kinetic analysis. *J Biomech*. 2006;39(9):1621-8. Epub 2005/07/02. doi:  
696 10.1016/j.jbiomech.2005.05.005. PubMed PMID: 15990102.
- 697 33. Silder A, Besier T, Delp SL. Predicting the metabolic cost of incline walking from muscle  
698 activity and walking mechanics. *J Biomech*. 2012;45(10):1842-9. Epub 2012/05/15. doi:  
699 10.1016/j.jbiomech.2012.03.032. PubMed PMID: 22578744; PubMed Central PMCID:  
700 PMC4504736.
- 701 34. Franz JR, Kram R. Advanced age and the mechanics of uphill walking: a joint-level, inverse  
702 dynamic analysis. *Gait Posture*. 2014;39(1):135-40. Epub 2013/07/16. doi:  
703 10.1016/j.gaitpost.2013.06.012. PubMed PMID: 23850328; PubMed Central PMCID:  
704 PMC3842369.
- 705 35. DeVita P, Helseth J, Hortobagyi T. Muscles do more positive than negative work in human  
706 locomotion. *The Journal of experimental biology*. 2007;210(Pt 19):3361-73. doi: 210/19/3361  
707 [pii].
- 708 36. Devita P, Janshen L, Rider P, Solnik S, Hortobagyi T. Muscle work is biased toward energy  
709 generation over dissipation in non-level running. *Journal of Biomechanics*. 2008;41(16):3354-9.  
710 doi: 10.1016/j.jbiomech.2008.09.024 [doi].

- 711 37. Alexander N, Strutzenberger G, Ameshofer LM, Schwameder H. Lower limb joint work and joint  
712 work contribution during downhill and uphill walking at different inclinations. *Journal of*  
713 *biomechanics*. 2017;61:75-80.
- 714 38. Montgomery JR, Grabowski AM. The contributions of ankle, knee and hip joint work to  
715 individual leg work change during uphill and downhill walking over a range of speeds. *Royal*  
716 *Society open science*. 2018;5(8):180550.
- 717 39. Pickle NT, Grabowski AM, Auyang AG, Silverman AK. The functional roles of muscles during  
718 sloped walking. *Journal of biomechanics*. 2016;49(14):3244-51.
- 719 40. Jeffers JR, Auyang AG, Grabowski AM. The correlation between metabolic and individual leg  
720 mechanical power during walking at different slopes and velocities. *Journal of biomechanics*.  
721 2015;48(11):2919-24.
- 722 41. Vernillo G, Giandolini M, Edwards WB, Morin J-B, Samozino P, Horvais N, et al. *Biomechanics*  
723 *and physiology of uphill and downhill running*. *Sports Medicine*. 2017;47(4):615-29.
- 724 42. Brockway JM. Derivation of formulae used to calculate energy expenditure in man. *Human*  
725 *nutritionClinical nutrition*. 1987;41(6):463-71.
- 726 43. Lee DV, McGuigan MP, Yoo EH, Biewener AA. Compliance, actuation, and work characteristics  
727 of the goat foreleg and hindleg during level, uphill, and downhill running. *Journal of applied*  
728 *physiology*. 2008;104(1):130-41.
- 729 44. McGuigan MP, Yoo E, Lee DV, Biewener AA. Dynamics of goat distal hind limb muscle–tendon  
730 function in response to locomotor grade. *Journal of Experimental Biology*. 2009;212(13):2092-  
731 104.
- 732 45. Qiao M, Abbas JJ, Jindrich DL. A model for differential leg joint function during human running.  
733 *Bioinspiration & biomimetics*. 2017;12(1):016015.
- 734 46. Qiao M, Jindrich DL. Leg joint function during walking acceleration and deceleration. *Journal of*  
735 *biomechanics*. 2016;49(1):66-72.

- 736 47. Farris DJ, Sawicki GS. The mechanics and energetics of human walking and running: a joint  
737 level perspective. *J R Soc Interface*. 2012;9(66):110-8. Epub 2011/05/27. doi:  
738 10.1098/rsif.2011.0182. PubMed PMID: 21613286; PubMed Central PMCID:  
739 PMCPMC3223624.
- 740 48. Roberts TJ. The integrated function of muscles and tendons during locomotion. *Comp Biochem*  
741 *Physiol A Mol Integr Physiol*. 2002;133(4):1087-99. Epub 2002/12/18. doi: 10.1016/s1095-  
742 6433(02)00244-1. PubMed PMID: 12485693.
- 743 49. Biewener AA, Roberts TJ. Muscle and tendon contributions to force, work, and elastic energy  
744 savings: a comparative perspective. *Exerc Sport Sci Rev*. 2000;28(3):99-107. Epub 2000/08/05.  
745 PubMed PMID: 10916700.
- 746 50. Roberts TJ, Azizi E. Flexible mechanisms: the diverse roles of biological springs in vertebrate  
747 movement. *J Exp Biol*. 2011;214(Pt 3):353-61. Epub 2011/01/14. doi: 10.1242/jeb.038588.  
748 PubMed PMID: 21228194; PubMed Central PMCID: PMCPMC3020146.
- 749 51. Snyder KL, Kram R, Gottschall JS. The role of elastic energy storage and recovery in downhill  
750 and uphill running. *Journal of Experimental Biology*. 2012;215(13):2283-7.
- 751 52. Margaria R. Positive and negative work performances and their efficiencies in human  
752 locomotion. *Internationale Zeitschrift fur angewandte Physiologie, einschliesslich*  
753 *Arbeitsphysiologie*. 1968;25(4):339-51. Epub 1968/05/28. doi: 10.1007/bf00699624. PubMed  
754 PMID: 5658204.
- 755 53. Davies CT, Barnes C. Negative (eccentric) work. II. Physiological responses to walking uphill  
756 and downhill on a motor-driven treadmill. *Ergonomics*. 1972;15(2):121-31. Epub 1972/03/01.  
757 doi: 10.1080/00140137208924416. PubMed PMID: 5036082.
- 758 54. Minetti AE, Ardigo LP, Saibene F. Mechanical determinants of gradient walking energetics in  
759 man. *J Physiol*. 1993;472:725-35. Epub 1993/12/01. doi: 10.1113/jphysiol.1993.sp019969.  
760 PubMed PMID: 8145168; PubMed Central PMCID: PMCPMC1160509.

- 761 55. Zai CZ, Grabowski AM. The metabolic power required to support body weight and accelerate  
762 body mass changes during walking on uphill and downhill slopes. *Journal of Biomechanics*.  
763 2020:109667.
- 764 56. Shepertycky M, Li Q. Generating Electricity during Walking with a Lower Limb-Driven Energy  
765 Harvester: Targeting a Minimum User Effort. *PLoS One*. 2015;10(6):e0127635. Epub  
766 2015/06/04. doi: 10.1371/journal.pone.0127635. PubMed PMID: 26039493; PubMed Central  
767 PMCID: PMC4454656.
- 768 57. Cervera A, Rubinshtein Ze, Gad M, Riemer R, Peretz MM. Biomechanical Energy Harvesting  
769 System With Optimal Cost-of-Harvesting Tracking Algorithm. *IEEE Journal of Emerging and*  
770 *Selected Topics in Power Electronics*. 2016;4(1):293-302.
- 771 58. MacLean MK, Ferris DP. Energetics of Walking With a Robotic Knee Exoskeleton. *Journal of*  
772 *applied biomechanics*. 2019;35(5):320-6.
- 773 59. Kao PC, Lewis CL, Ferris DP. Invariant ankle moment patterns when walking with and without a  
774 robotic ankle exoskeleton. *Journal of Biomechanics*. 2010;43(2):203-9. doi:  
775 10.1016/j.jbiomech.2009.09.030 [doi].
- 776 60. Lewis CL, Ferris DP. Invariant hip moment pattern while walking with a robotic hip exoskeleton.  
777 *Journal of Biomechanics*. 2011;44(5):789-93. doi: 10.1016/j.jbiomech.2011.01.030 [doi].
- 778 61. Koller JR, Remy CD, Ferris DP. Biomechanics and energetics of walking in powered ankle  
779 exoskeletons using myoelectric control versus mechanically intrinsic control. *Journal of*  
780 *neuroengineering and rehabilitation*. 2018;15(1):42.
- 781 62. Mahon CE, Farris DJ, Sawicki GS, Lewek MD. Individual limb mechanical analysis of gait  
782 following stroke. *Journal of Biomechanics*. 2015;48(6):984-9.
- 783 63. McCain EM, Dick TJM, Giest TN, Nuckols RW, Lewek MD, Saul KR, et al. Mechanics and  
784 energetics of post-stroke walking aided by a powered ankle exoskeleton with speed-adaptive  
785 myoelectric control. *J Neuroeng Rehabil*. 2019;16(1):57. Epub 2019/05/17. doi: 10.1186/s12984-  
786 019-0523-y. PubMed PMID: 31092269; PubMed Central PMCID: PMC6521500.

- 787 64. Alexander RM. Optimum Muscle Design for Oscillatory Movements. *J Theor Biol.*  
788 1997;184(3):253-9. Epub 1997/02/07. doi: 10.1006/jtbi.1996.0271. PubMed PMID: 31940736.
- 789 65. Rubinshtein Ze, Peretz MM, Riemer R, editors. Biomechanical energy harvesting system with  
790 optimal cost-of-harvesting tracking algorithm. 2014 IEEE Applied Power Electronics Conference  
791 and Exposition-APEC 2014; 2014: IEEE.
- 792 66. Xie L, Li X, Cai S, Huang G, Huang L. Knee-braced energy harvester: Reclaim energy and assist  
793 walking. *Mechanical Systems and Signal Processing.* 2019;127:172-89.
- 794 67. Diller S, Majidi C, Collins SH, editors. A lightweight, low-power electroadhesive clutch and  
795 spring for exoskeleton actuation. 2016 IEEE International Conference on Robotics and  
796 Automation (ICRA); 2016: IEEE.
- 797 68. Collins SH, Kuo AD. Controlled energy storage and return prosthesis reduces metabolic cost of  
798 walking. *Power.* 2005;600:800.
- 799 69. Segal AD, Zelik KE, Klute GK, Morgenroth DC, Hahn ME, Orendurff MS, et al. The effects of a  
800 controlled energy storage and return prototype prosthetic foot on transtibial amputee ambulation.  
801 *Human movement science.* 2012;31(4):918-31.
- 802 70. Sutrisno A, Braun DJ. Enhancing mobility with quasi-passive variable stiffness exoskeletons.  
803 *IEEE Transactions on Neural Systems and Rehabilitation Engineering.* 2019;27(3):487-96.
- 804 71. Montgomery JR, Grabowski AM. Use of a powered ankle-foot prosthesis reduces the metabolic  
805 cost of uphill walking and improves leg work symmetry in people with transtibial amputations.  
806 *Journal of The Royal Society Interface.* 2018;15(145):20180442.

807

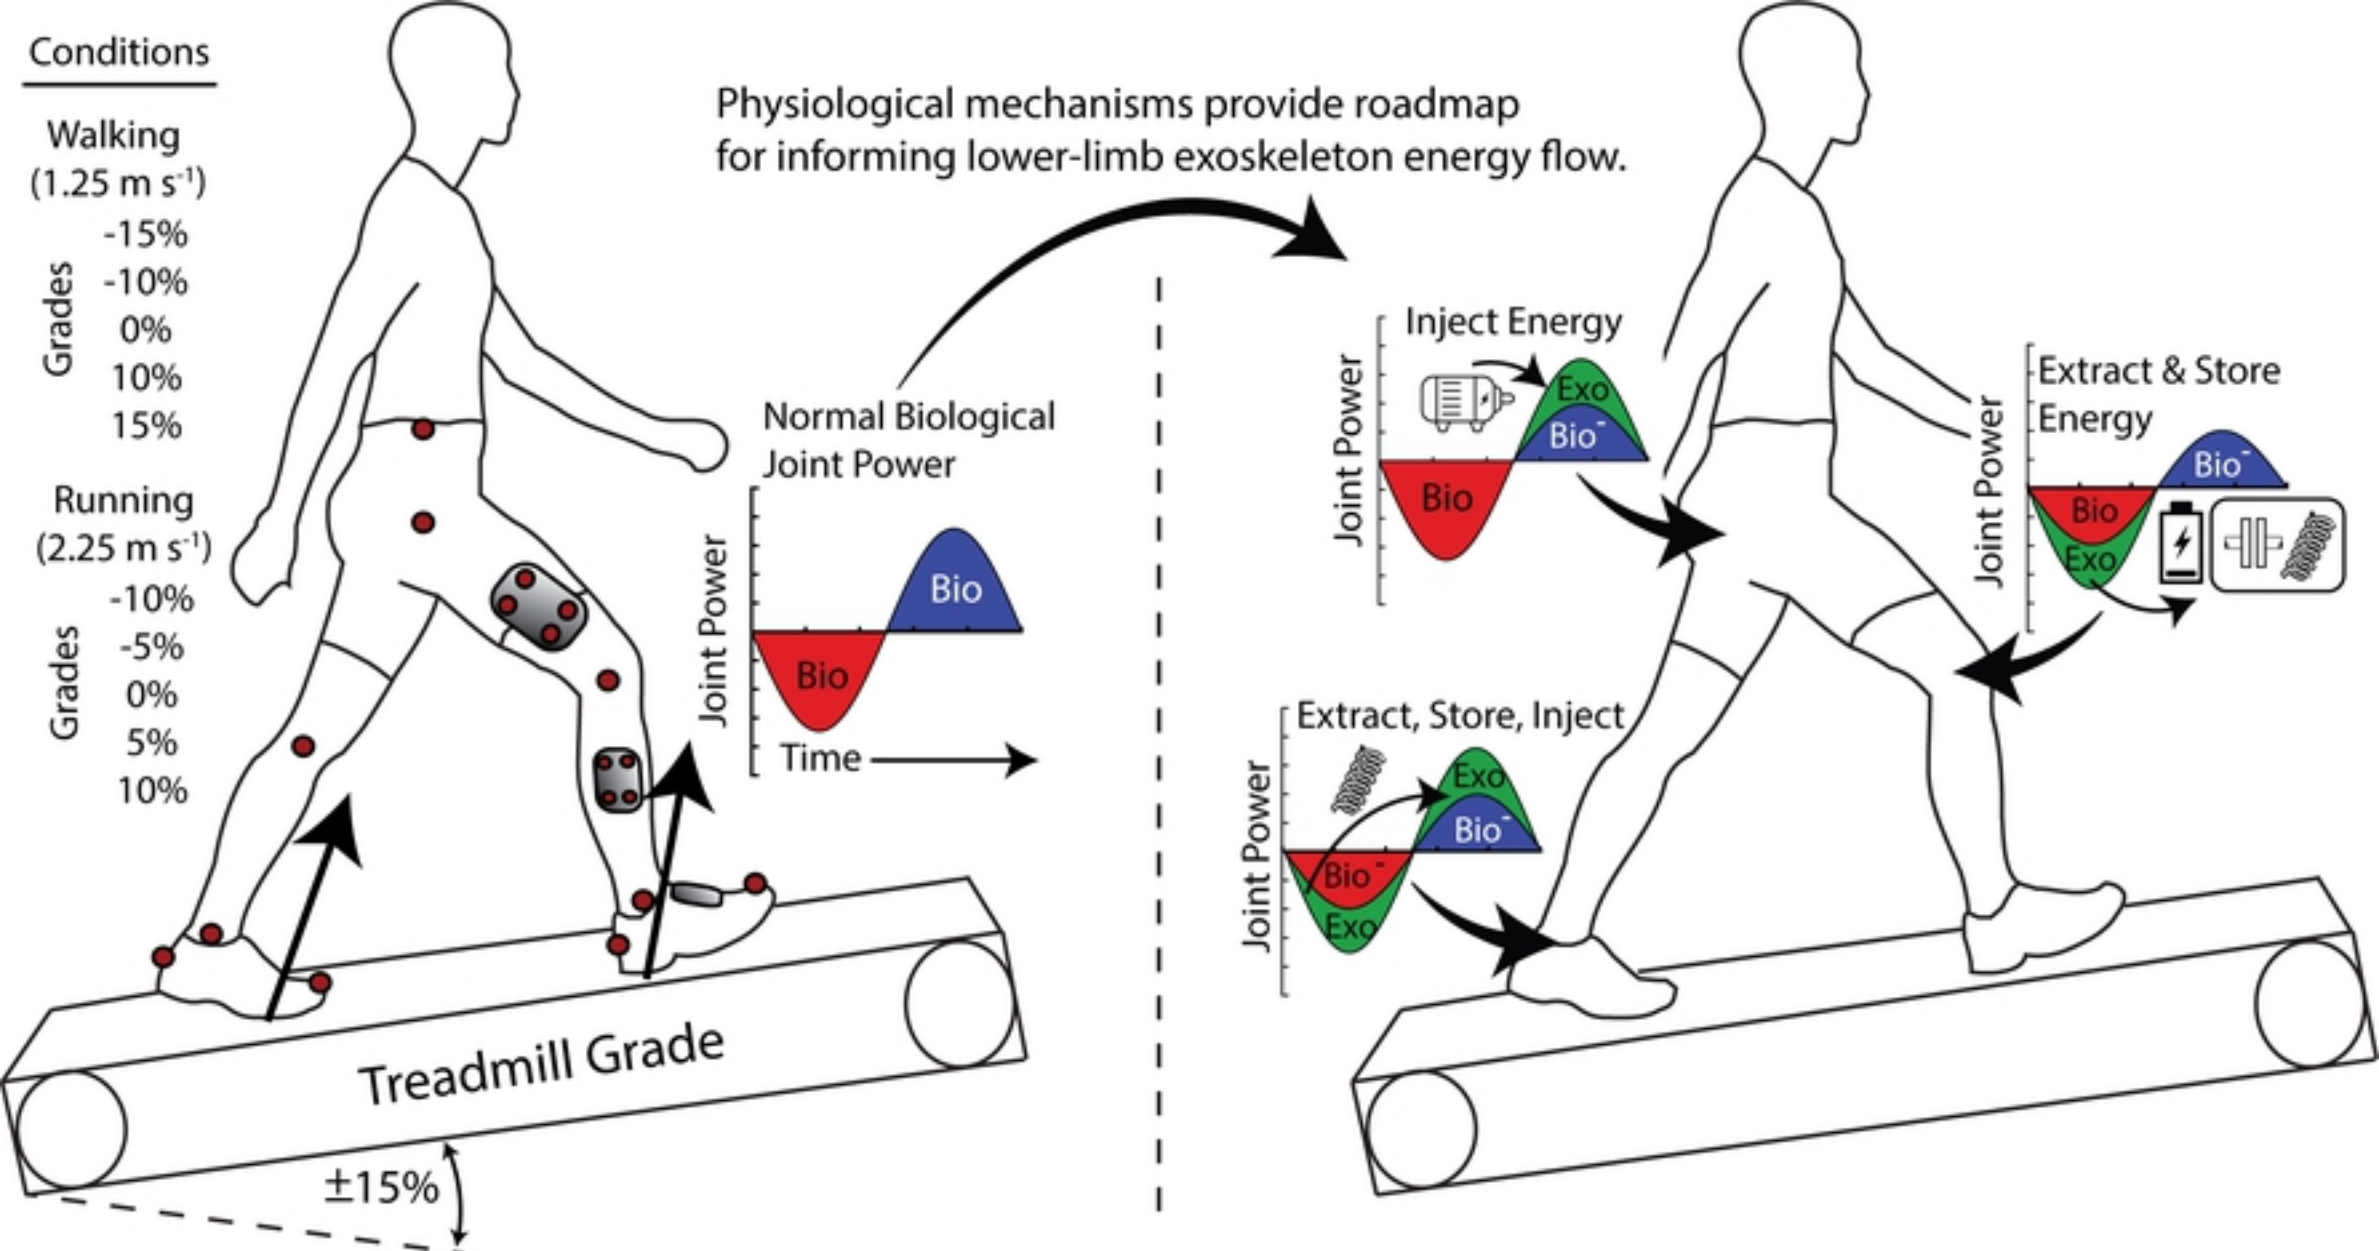

Figure 1

# Walking (1.25 m s<sup>-1</sup>)

**A**

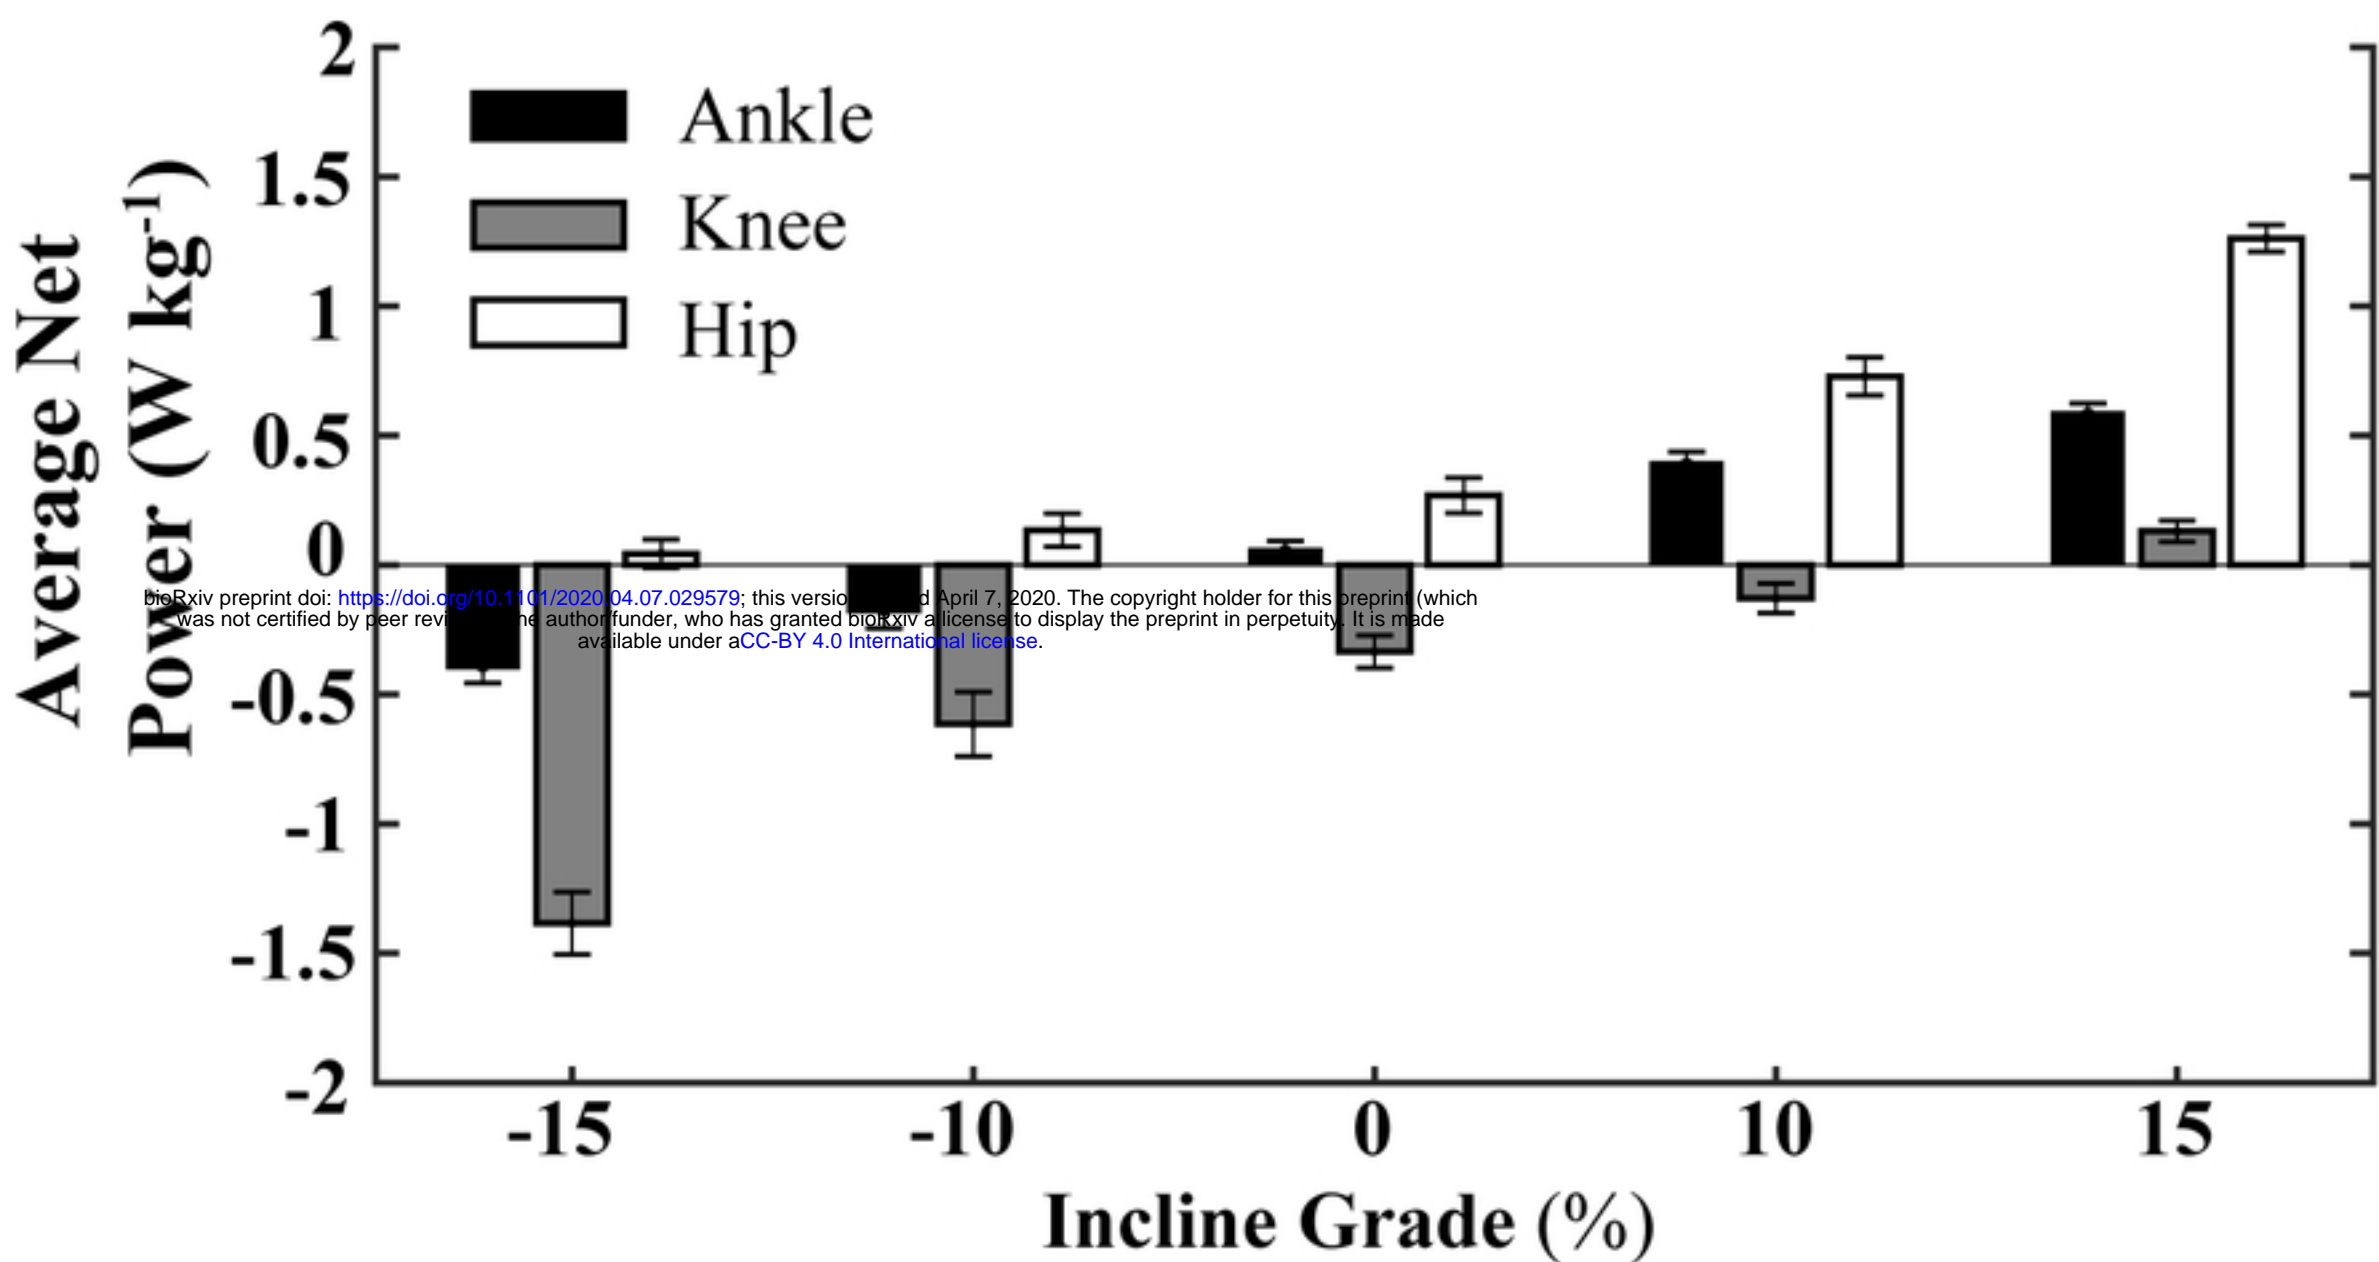

**B**

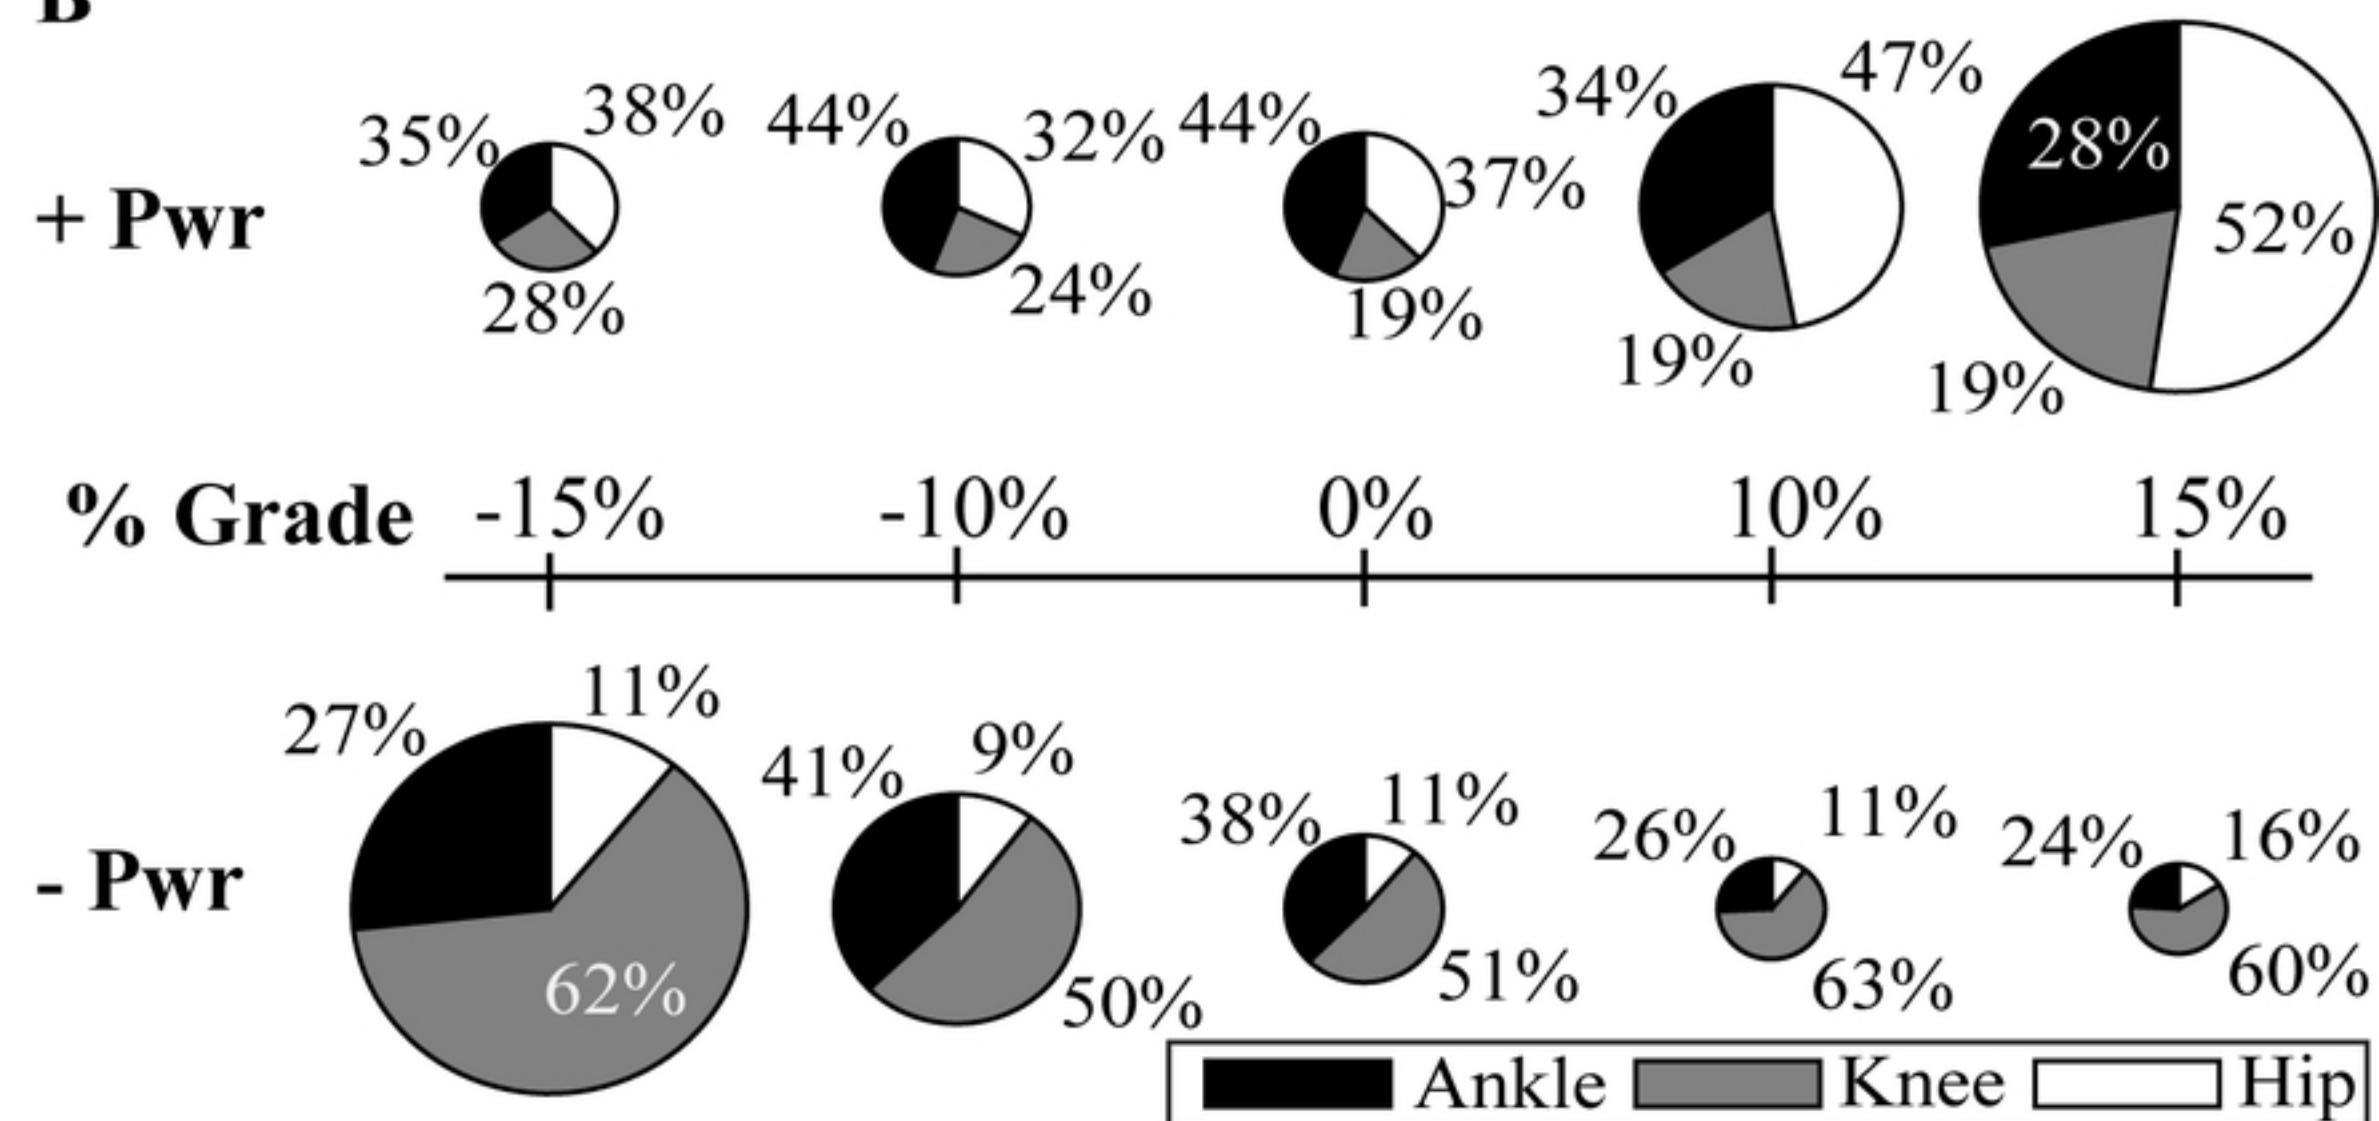

Figure 2

# Running (2.25 m s<sup>-1</sup>)

**A**

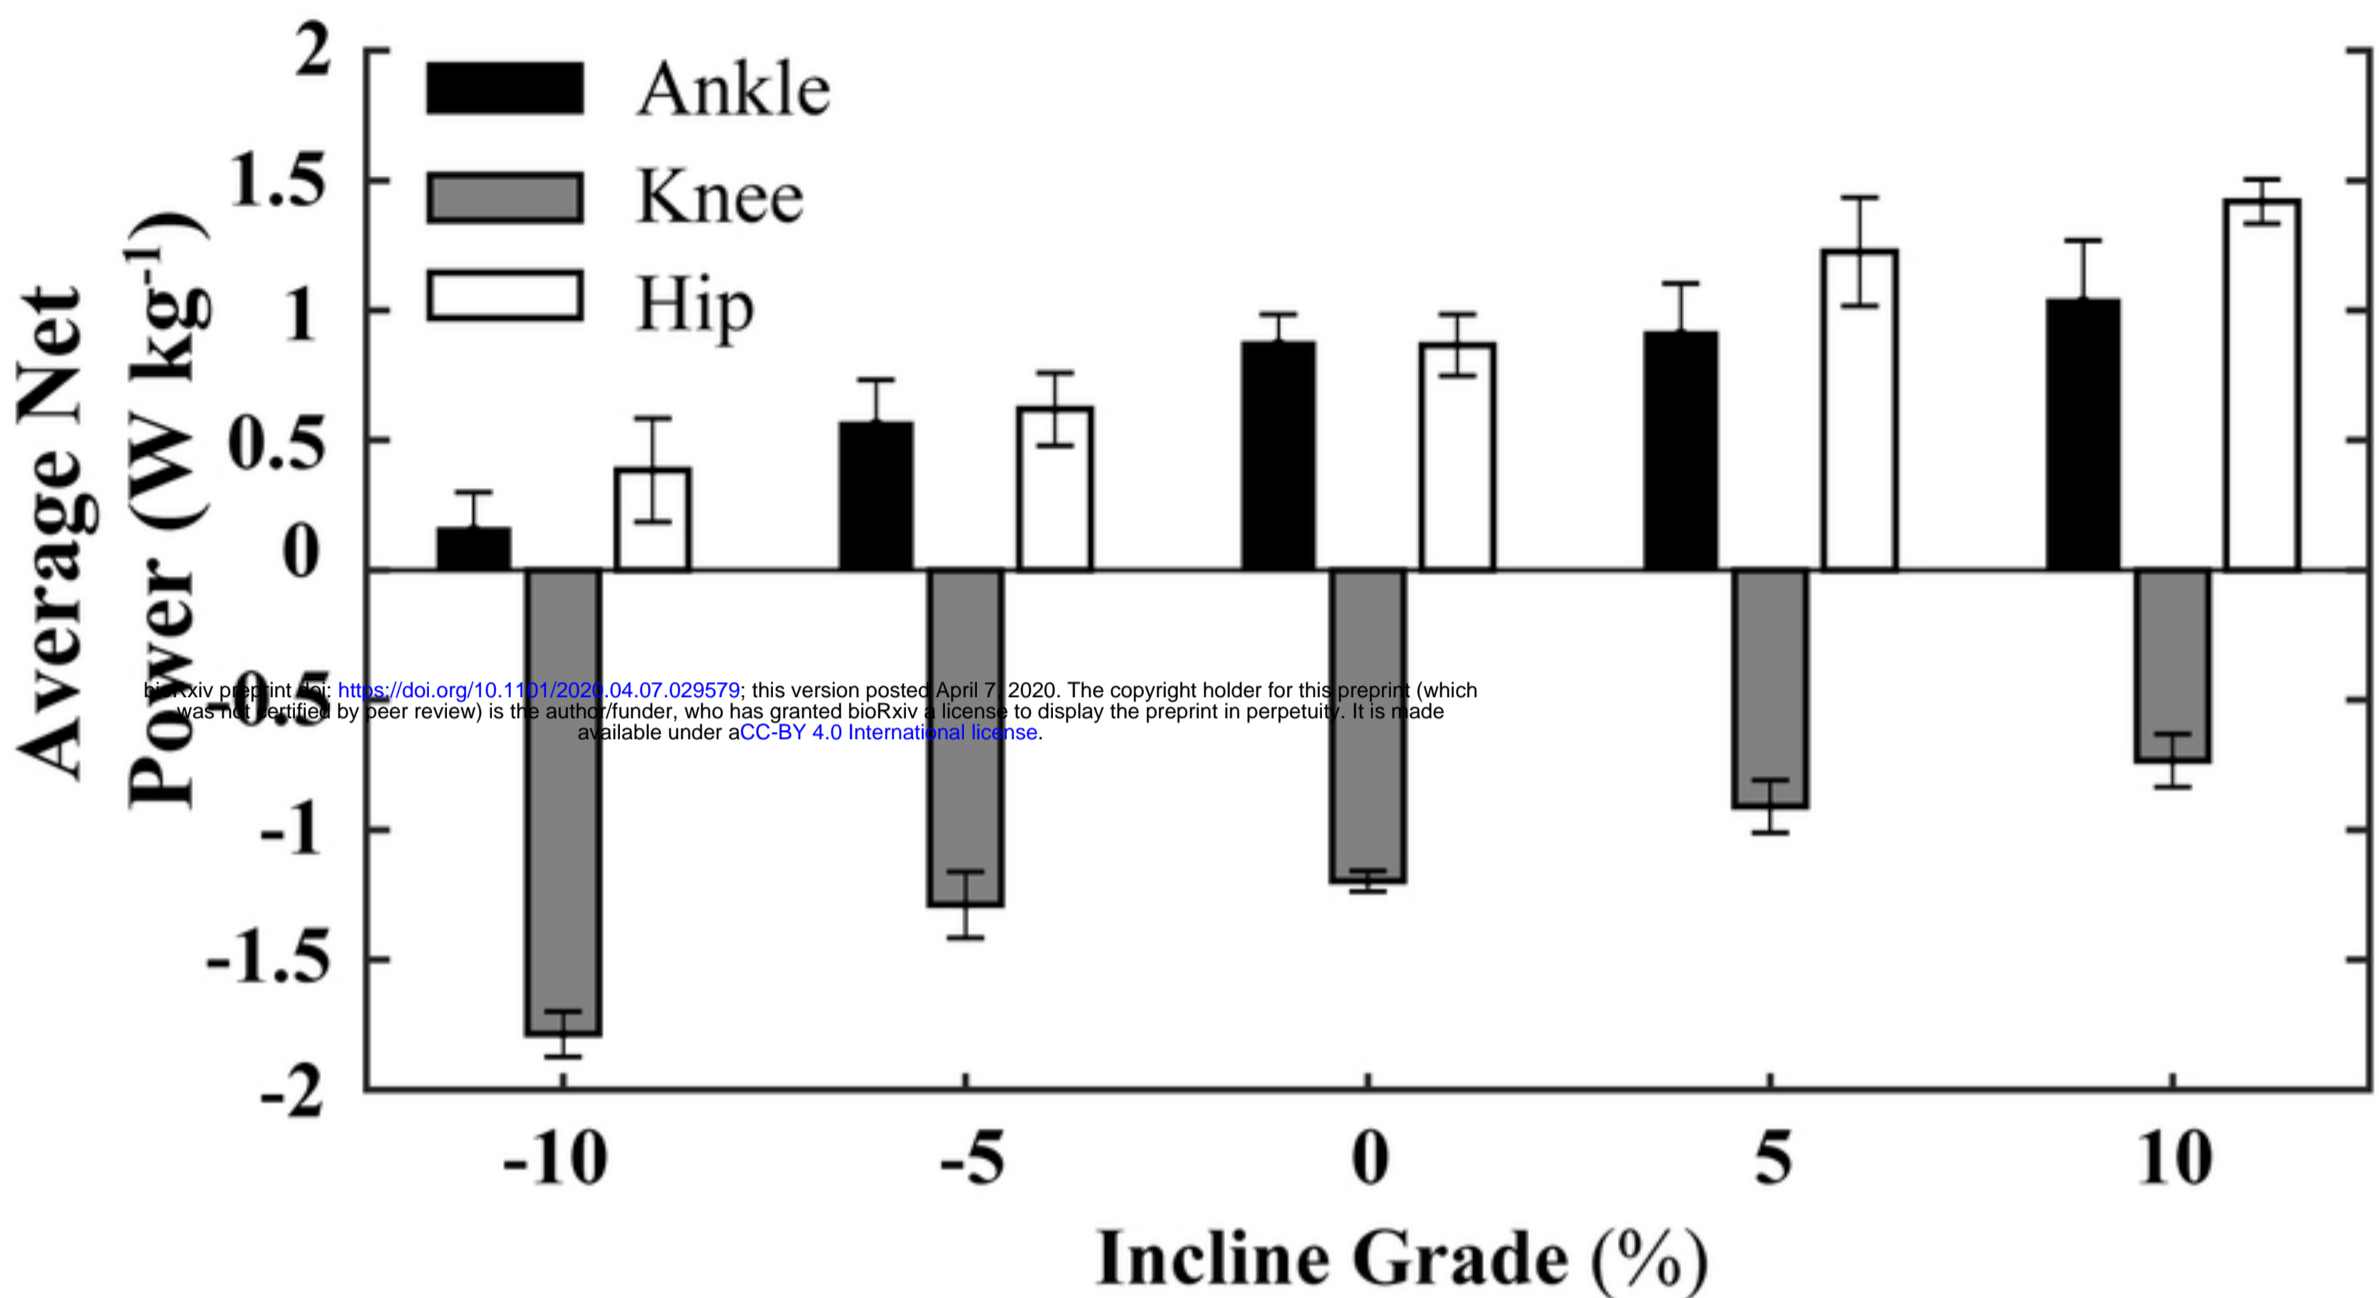

**B**

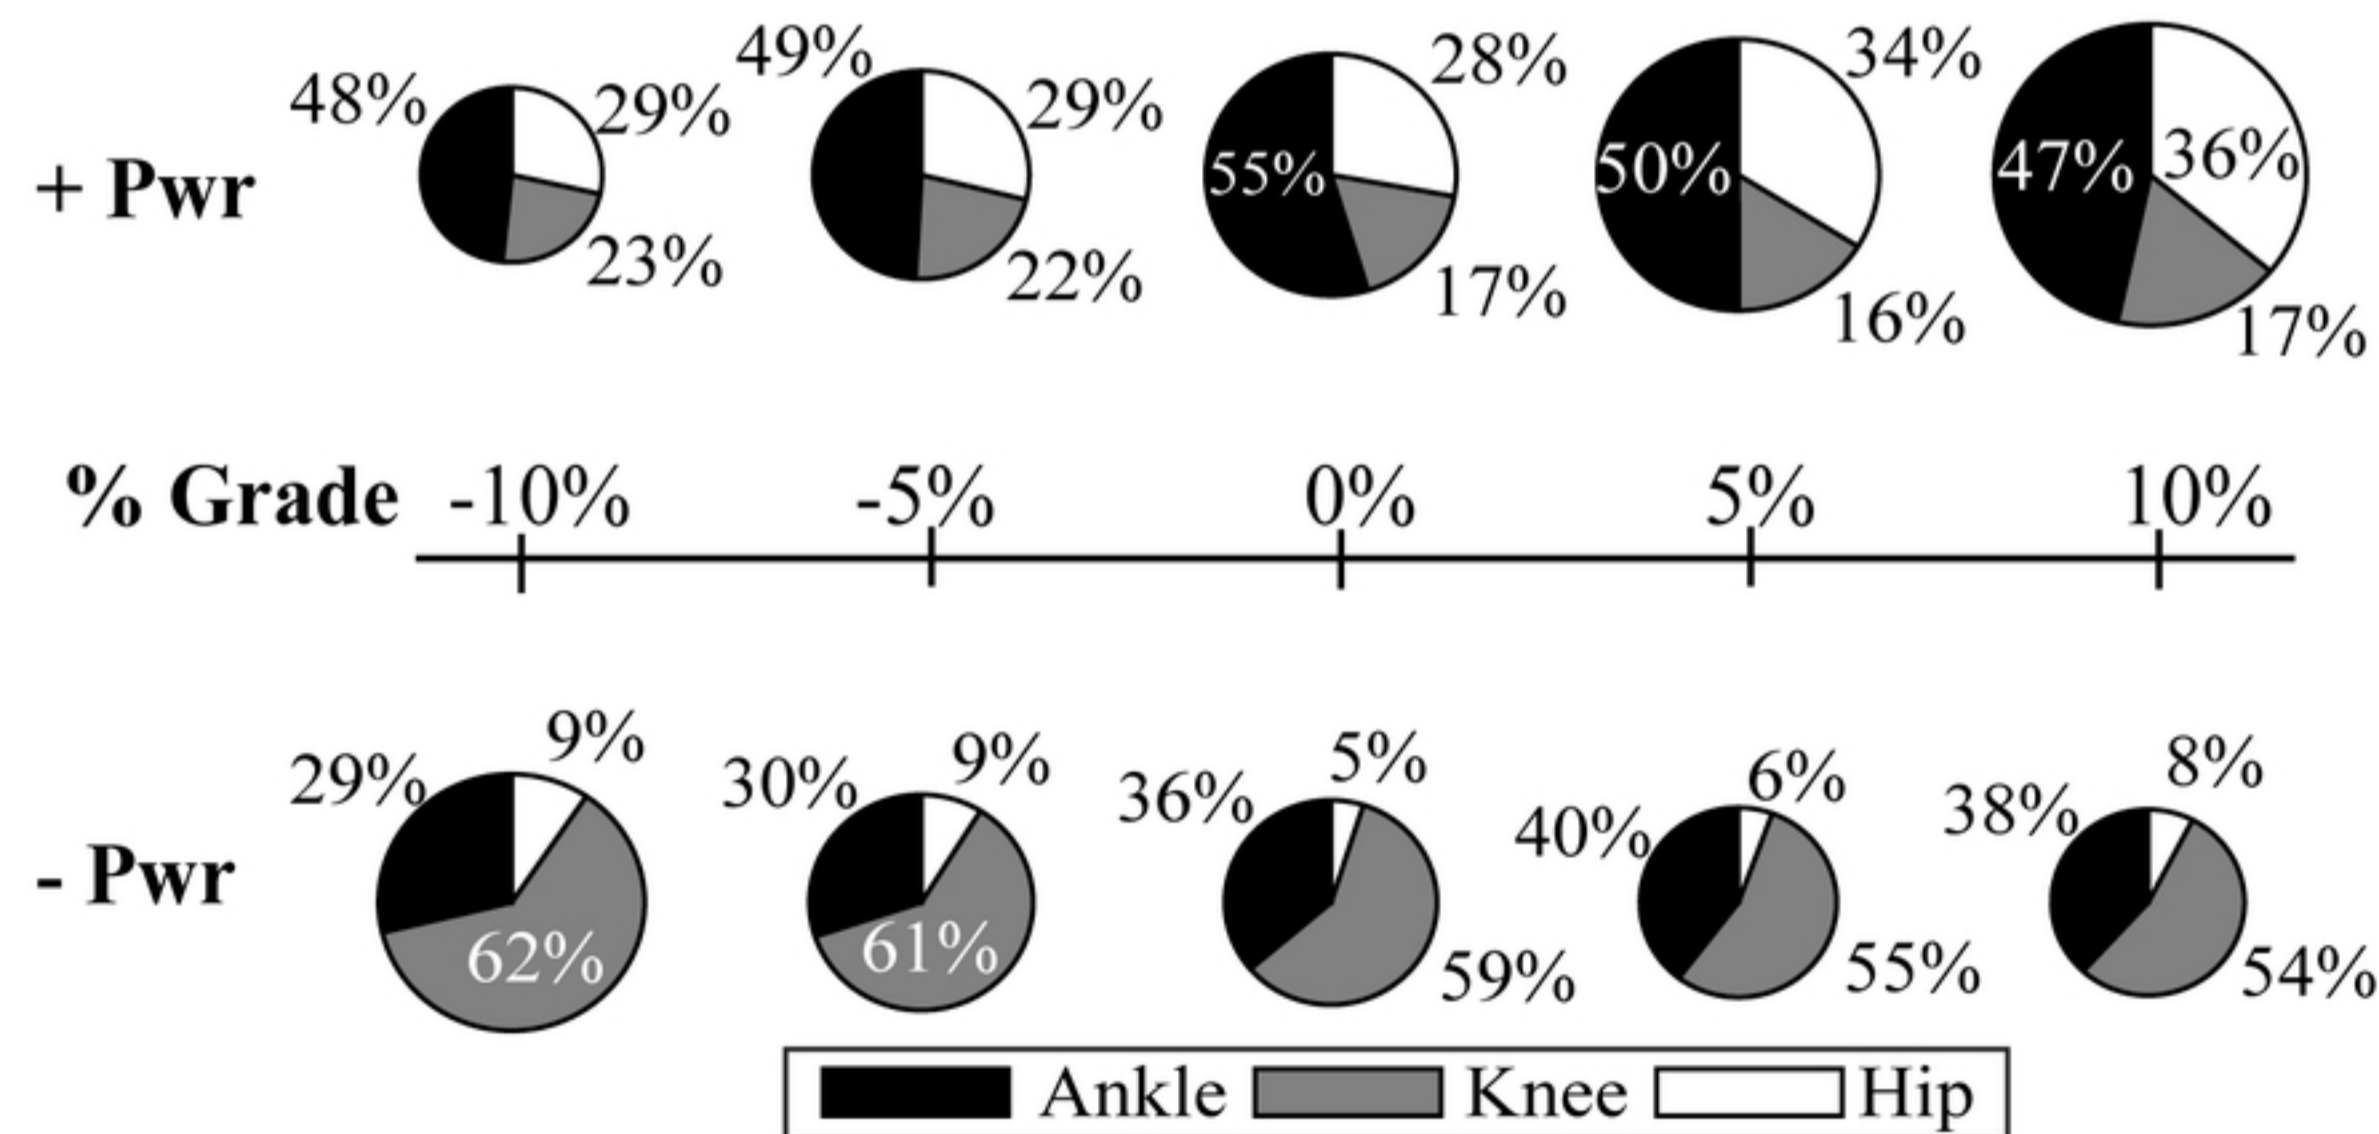

Figure 3



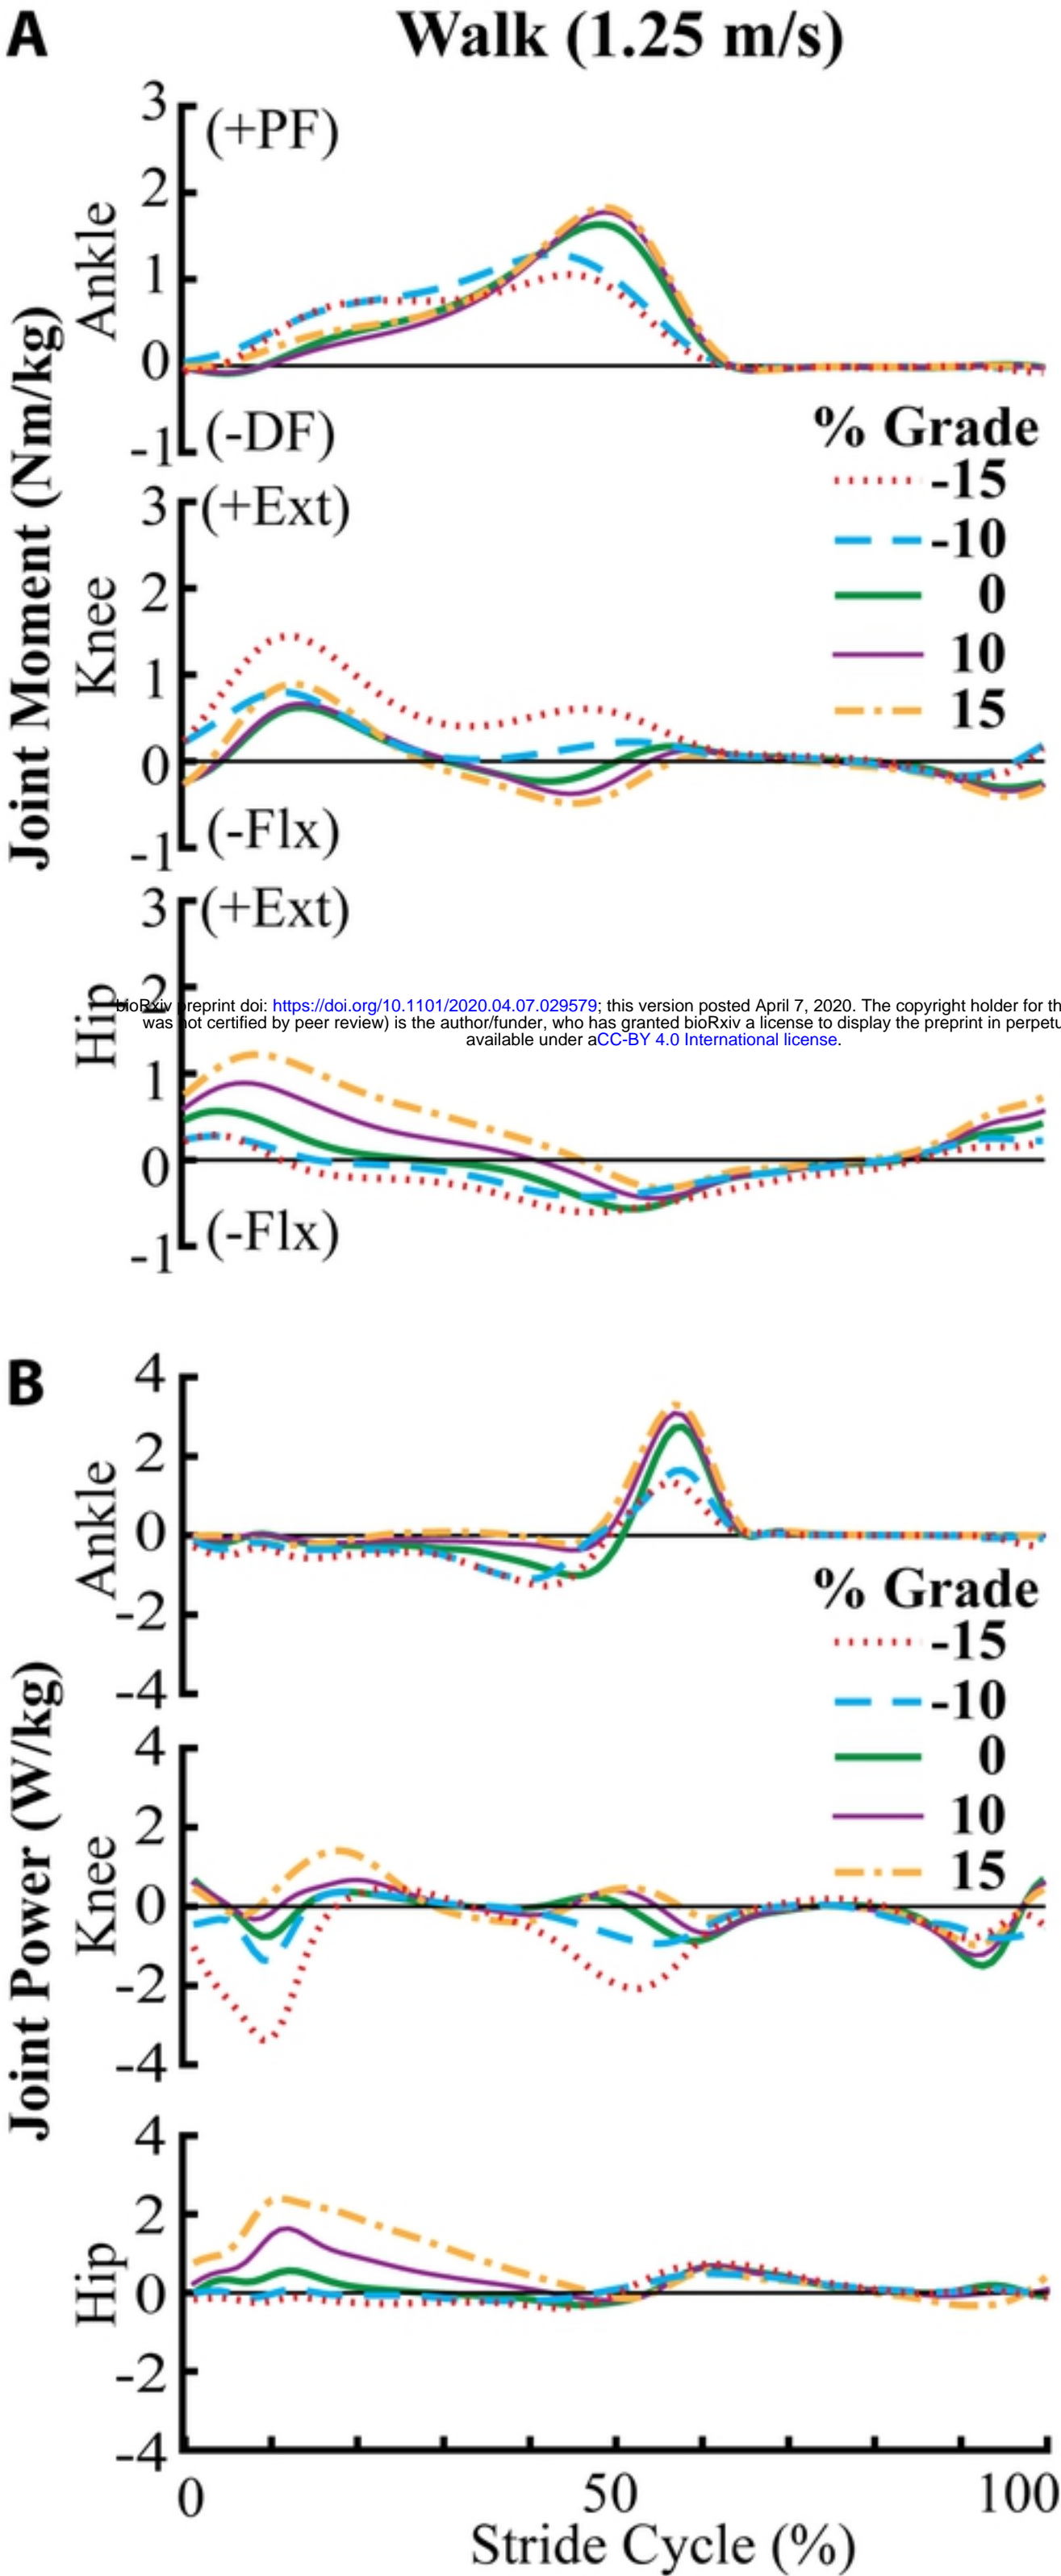

Figure 4

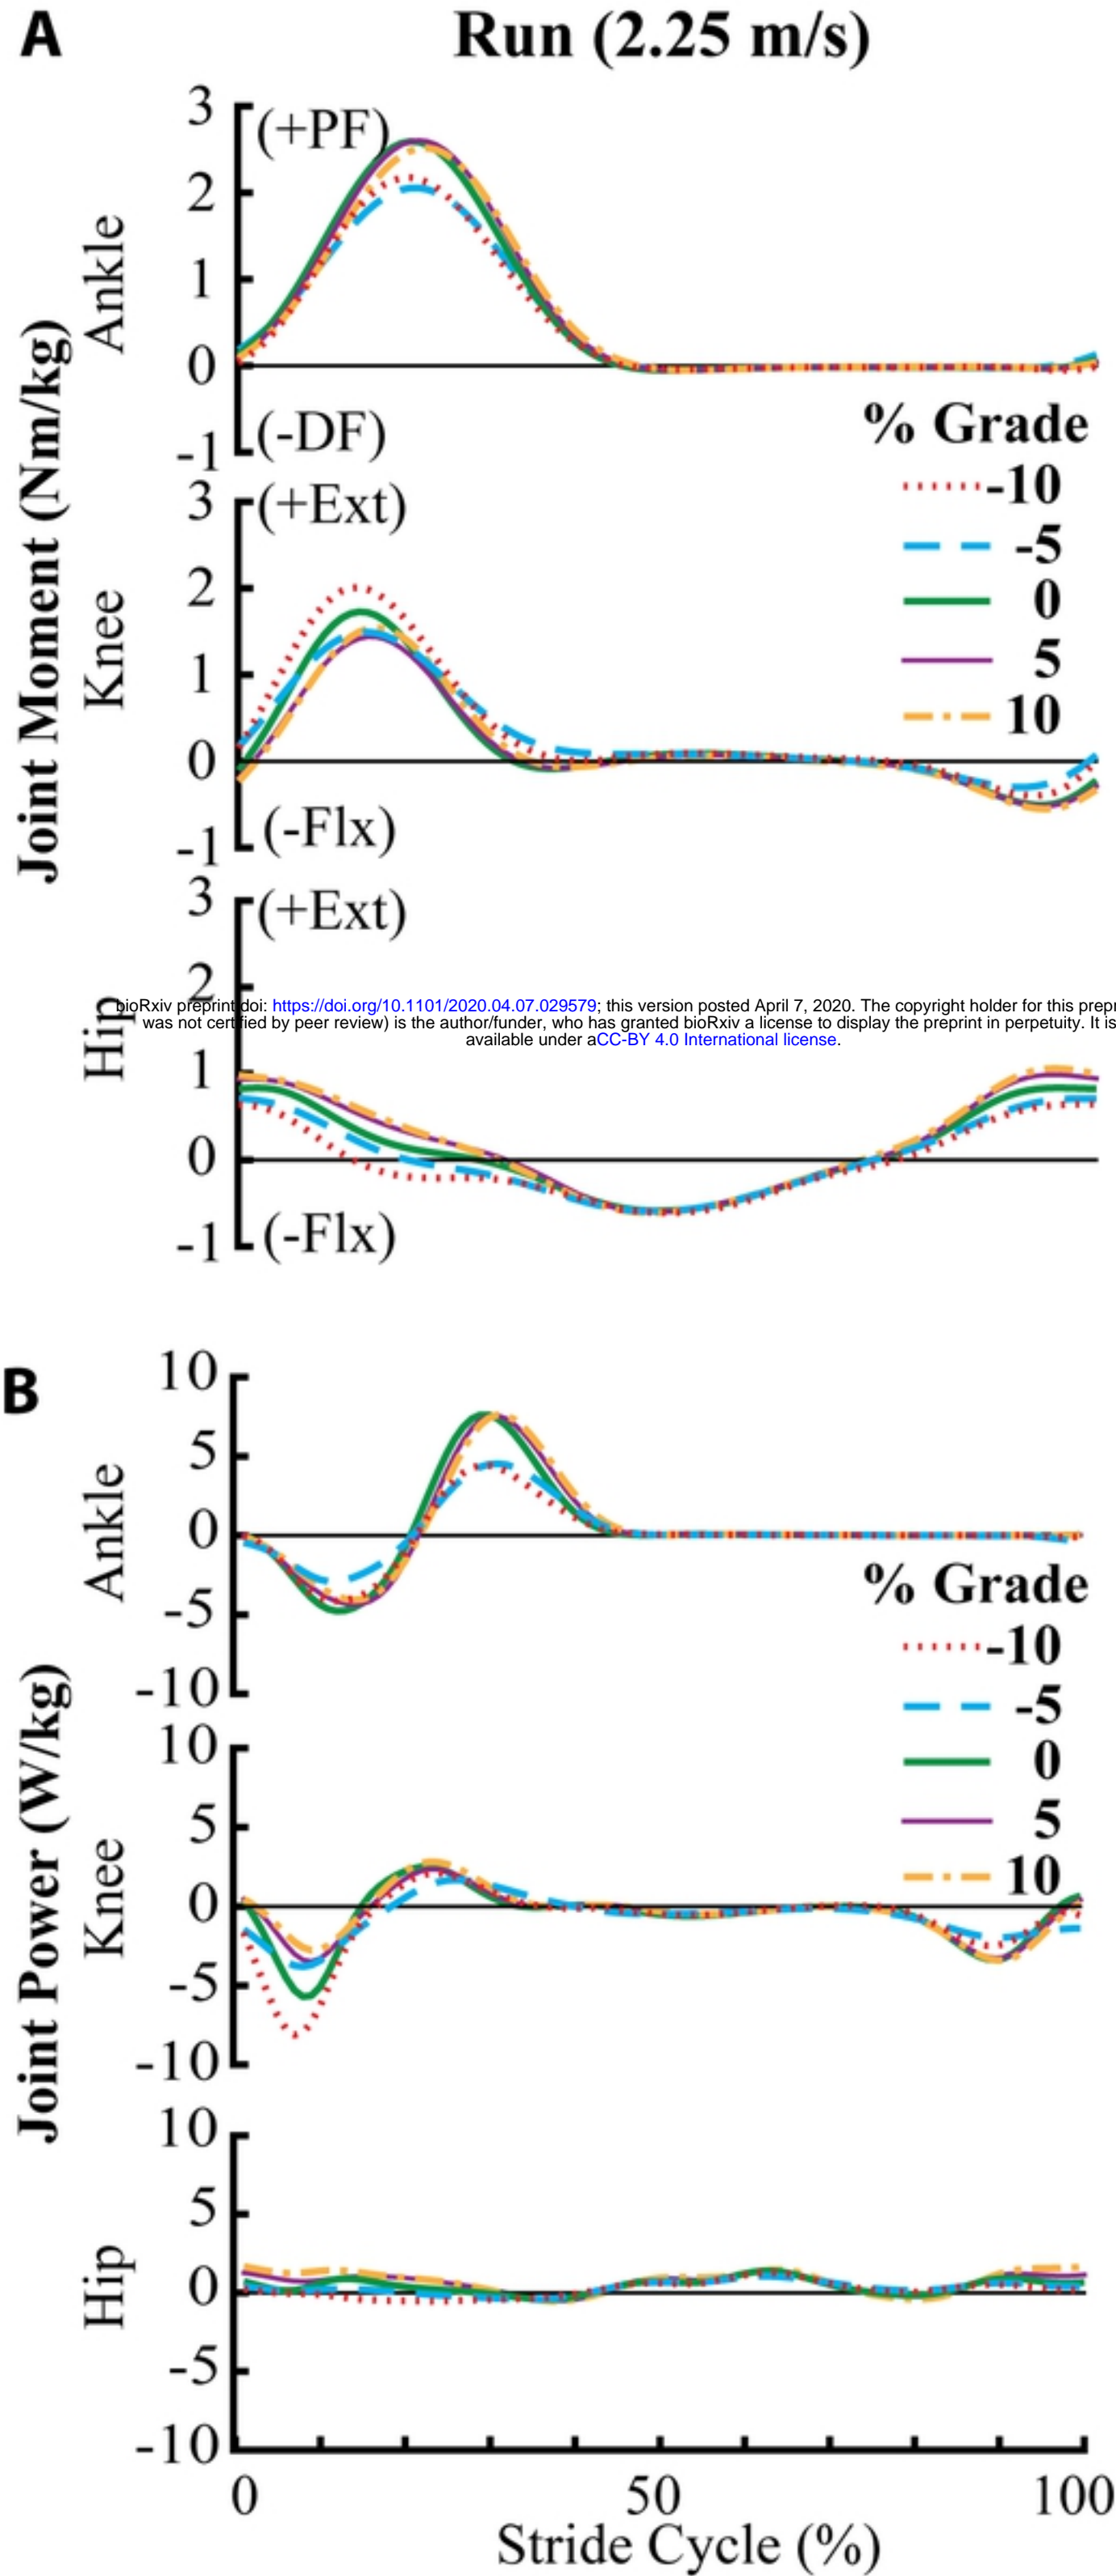

Figure 5

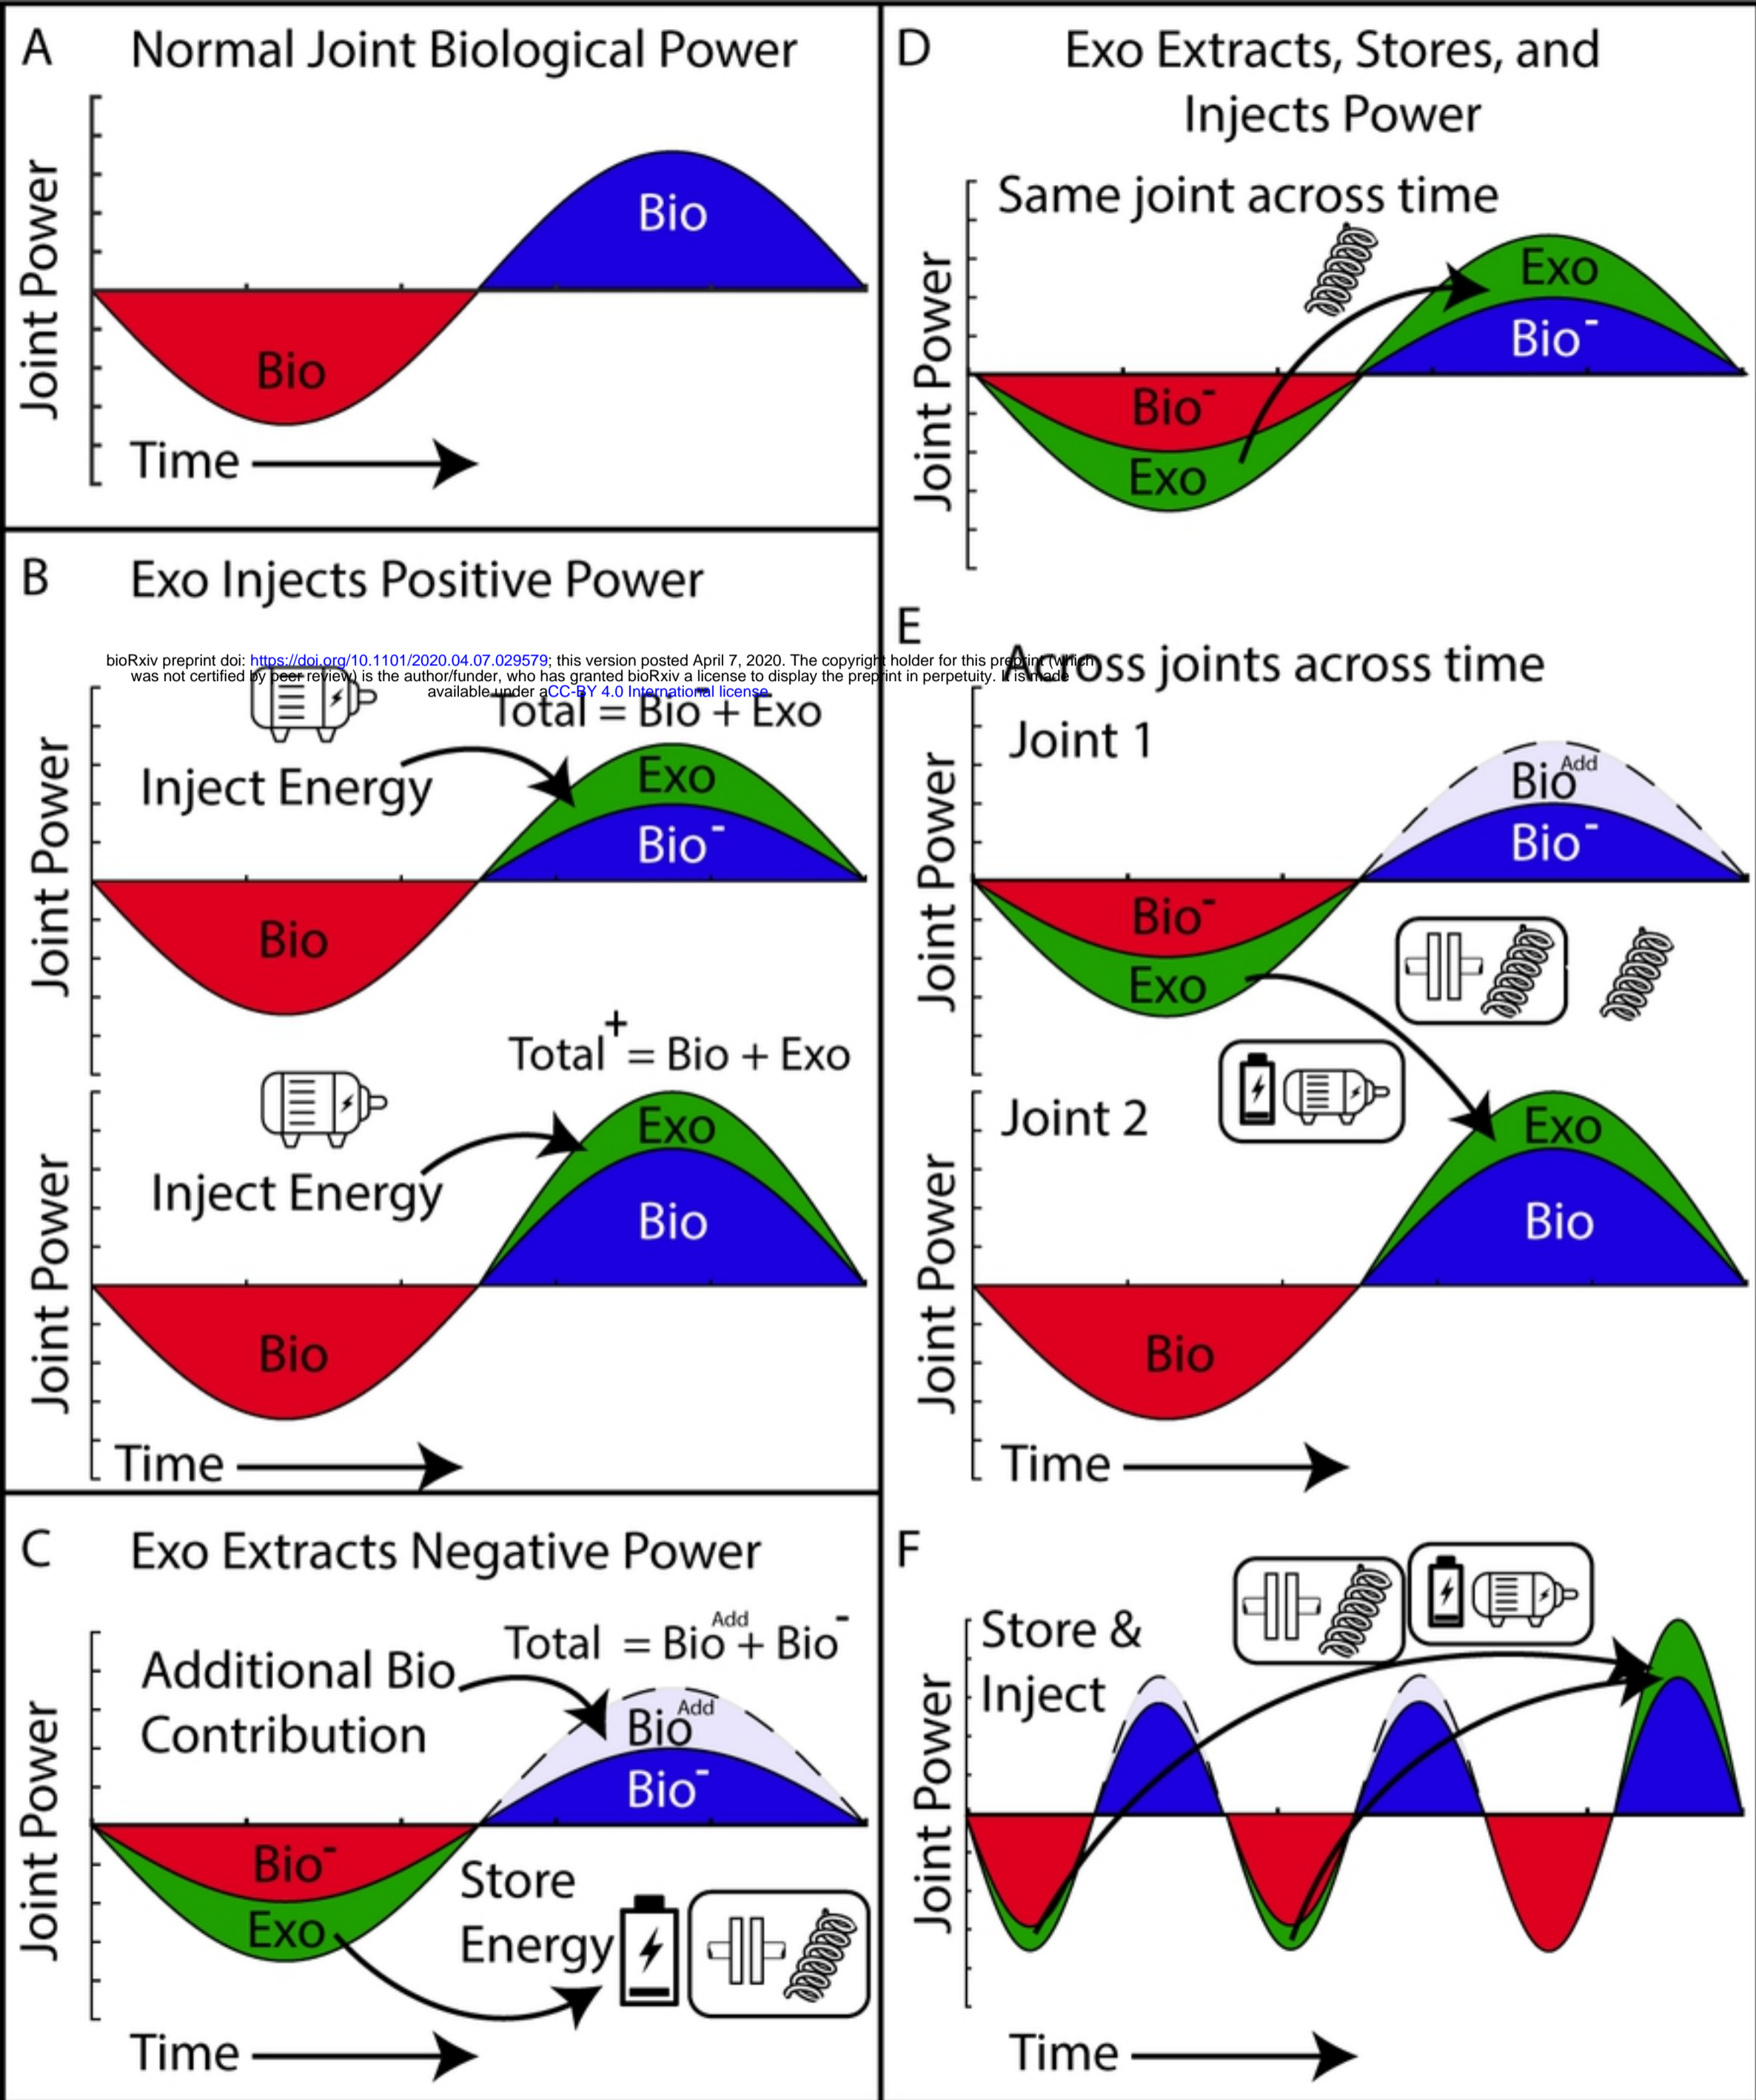

Figure 6
